# Supplementary material
Source: Springer Nature journal article supplement (https://www.springermedizin.de/resource/supplementary/12936_2014_3366_MOESM2_ESM.pdf/9545740)
Supplement: MOESM2 [file 9545740]

Additional file 2 : Fold-change of probes comparing the three conditions UT8, UT16 and T16.

| Accession number                      | [UT8] vs [UT16] |            | [UT16] vs [T16] |            | [UT8] vs [T16] |            |
|---------------------------------------|-----------------|------------|-----------------|------------|----------------|------------|
|                                       | Fold-change     | Regulation | Fold-change     | Regulation | Fold-change    | Regulation |
| Pfa3D7;chr12;PFL0740c;Pf_66_66        | -4.8484178      | Down       | 3.7848868       | Up         | -1.2220087     | Down       |
| Pfa3D7;chr8;PF08_0131;Pf_539_539      | -3.18109        | Down       | 5.7941246       | Up         | 1.8084611      | Up         |
| Pfa3D7;chr8;PF08_0131;Pf_499_499      | -3.368678       | Down       | 6.106556        | Up         | 1.991527       | Up         |
| Pfa3D7;chr12;PFL1940w;Pf_1437_1437    | 2.5659366       | Up         | -1.7457757      | Down       | 1.3457848      | Up         |
| Pfa3D7;chr12;PFL1940w;Pf_1506_1506    | 2.1103203       | Up         | -1.7760226      | Down       | 1.090887       | Up         |
| Pfa3D7;chr13;PF13_0316;Pf_283_283     | 1.2377503       | Up         | 1.6738536       | Up         | 2.0536761      | Up         |
| Pfa3D7;chr14;PF14_0205;Pf_230_230     | -1.2139212      | Down       | 2.085605        | Up         | 1.7269375      | Up         |
| Pfa3D7;pfa_chr5;PFE0150c;Pf_1388_1388 | -2.0534332      | Down       | 2.1036472       | Up         | 1.0280988      | Up         |
| Pfa3D7;pfa_chr5;PFE0150c;Pf_1543_1543 | -2.2090895      | Down       | 2.1601088       | Up         | -1.0318563     | Down       |
| Pfa3D7;chr6;PFF1335c;Pf_460_460       | -1.1448604      | Down       | 2.4626384       | Up         | 2.2310085      | Up         |
| Pfa3D7;chr6;PFF1335c;Pf_500_500       | -1.131614       | Down       | 2.375103        | Up         | 2.1251514      | Up         |
| Pfa3D7;chr6;PFF0700c;Pf_400_400       | -1.409991       | Down       | 2.8050072       | Up         | 1.8976911      | Up         |
| Pfa3D7;chr11;PF11_0437;Pf_230_230     | -1.2535751      | Down       | 2.6016674       | Up         | 2.0436296      | Up         |
| Pfa3D7;pfa_chr3;PFC0200w;Pf_85_85     | 1.0178117       | Up         | 2.1894875       | Up         | 2.208473       | Up         |
| Pfa3D7;chr7;PF07_0047;Pf_3388_3388    | -2.4469323      | Down       | 2.5648253       | Up         | 1.0915327      | Up         |
| Pfa3D7;chr7;PF07_0047;Pf_3219_3219    | -2.3056035      | Down       | 2.7850225       | Up         | 1.1916834      | Up         |
| Pfa3D7;chr13;PF13_0218;Pf_2719_2719   | -1.933365       | Down       | 2.0417395       | Up         | -1.0062978     | Down       |
| Pfa3D7;pfa_chr1;PFA0590w;Pf_5295_5295 | -3.920893       | Down       | 2.056374        | Up         | -2.005876      | Down       |
| Pfa3D7;pfa_chr1;PFA0590w;Pf_5335_5335 | -3.599664       | Down       | 1.971297        | Up         | -1.7950262     | Down       |
| Pfa3D7;chr12;PFL0495c;Pf_1781_1781    | -1.7718472      | Down       | 2.1842325       | Up         | 1.1043102      | Up         |
| Pfa3D7;chr8;PF08_0078;Pf_3993_3993    | -2.805452       | Down       | 2.6171887       | Up         | -1.0965753     | Down       |
| Pfa3D7;chr14;PF14_0282;Pf_7816_7816   | 2.7604315       | Up         | -1.7508823      | Down       | 1.5259942      | Up         |
| Pfa3D7;pfa_chr3;PFC0360w;Pf_81_81     | -2.9500182      | Down       | 4.058666        | Up         | 1.5572621      | Up         |
| Pfa3D7;chr14;PF14_0749;Pf_62_62       | 4.6855683       | Up         | -2.2340953      | Down       | 2.2834814      | Up         |
| Pfa3D7;chr10;PF10_0015;Pf_31_31       | 9.930037        | Up         | -2.690503       | Down       | 3.9468307      | Up         |
| Pfa3D7;chr10;PF10_0014;Pf_353_353     | 7.4545307       | Up         | -2.4111788      | Down       | 3.2411196      | Up         |
| Pfa3D7;chr10;PF10_0016;Pf_61_61       | -5.237448       | Down       | 12.704781       | Up         | 2.4922802      | Up         |
| Pfa3D7;chr14;PF14_0761;Pf_1648_1648   | 5.676916        | Up         | -2.4295566      | Down       | 2.4415002      | Up         |
| Pfa3D7;chr14;PF14_0761;Pf_1608_1608   | 6.5484943       | Up         | -2.7429876      | Down       | 2.2023218      | Up         |
| Pfa3D7;chr7;PF07_0129;Pf_2308_2308    | -2.0054097      | Down       | 2.9375286       | Up         | 1.5628653      | Up         |
| Pfa3D7;chr7;PF07_0129;Pf_2070_2070    | -1.9193254      | Down       | 3.2325606       | Up         | 1.6786796      | Up         |
| Pfa3D7;pfa_chr4;PFD0085c;Pf_2380_2380 | 5.235368        | Up         | -2.1871154      | Down       | 2.3028584      | Up         |
| Pfa3D7;chr12;PFL0035c;Pf_2565_2565    | 5.714501        | Up         | -1.5920793      | Down       | 3.5397215      | Up         |
| Pfa3D7;chr12;PFL0035c;Pf_2653_2653    | 4.8016515       | Up         | -1.576022       | Down       | 3.0131967      | Up         |
| Pfa3D7;pfa_chr2;PFB0695c;Pf_2239_2239 | 2.343231        | Up         | -1.8930925      | Down       | 1.1916353      | Up         |
| Pfa3D7;chr7;MAL7P1.164;Pf_2406_2406   | 3.0901732       | Up         | -2.8014386      | Down       | -1.0263555     | Down       |
| Pfa3D7;chr14;PF14_0386;Pf_2125_2125   | -4.310942       | Down       | 2.8274415       | Up         | -1.5860776     | Down       |
| Pfa3D7;chr14;PF14_0386;Pf_2044_2044   | -4.9181843      | Down       | 3.0024047       | Up         | -1.5981996     | Down       |
| Pfa3D7;pfa_chr4;PFD0755c;Pf_589_589   | -3.0512896      | Down       | 3.3973582       | Up         | 1.1141076      | Up         |
| Pfa3D7;chr8;PF08_0062;Pf_757_757      | 1.1123145       | Up         | -2.5447924      | Down       | -2.619558      | Down       |
| Pfa3D7;chr10;PF10_0051;Pf_788_788     | -2.4825528      | Down       | 2.2802505       | Up         | -1.0539793     | Down       |
| Pfa3D7;chr10;PF10_0051;Pf_924_924     | -2.2413282      | Down       | 2.108382        | Up         | -1.0974892     | Down       |
| Pfa3D7;chr13;MAL13P1.297;Pf_430_430   | 1.5265839       | Up         | -2.3325293      | Down       | -1.4439714     | Down       |
| Pfa3D7;chr14;PF14_0399;Pf_429_429     | -2.5344396      | Down       | 1.8953149       | Up         | -1.3657614     | Down       |
| Pfa3D7;chr7;MAL7P1.178;Pf_1757_1757   | 2.3703985       | Up         | -1.8916202      | Down       | 1.1940534      | Up         |
| Pfa3D7;chr12;PFL0420w;Pf_4624_4624    | -3.369896       | Down       | 1.6191291       | Up         | -2.0025115     | Down       |
| Pfa3D7;pfa_chr5;PFE0775c;Pf_2768_2768 | -1.2761834      | Down       | -1.8091094      | Down       | -2.223313      | Down       |
| Pfa3D7;chr14;PF14_0015;Pf_1342_1342   | -4.0356464      | Down       | -1.8003854      | Down       | -6.711135      | Down       |
| Pfa3D7;chr11;PF11_0197;Pf_963_963     | -2.2123315      | Down       | 2.6209455       | Up         | 1.190923       | Up         |
| Pfa3D7;chr14;PF14_0222;Pf_1598_1598   | 1.3782362       | Up         | -2.3361578      | Down       | -1.6413275     | Down       |
| Pfa3D7;chr14;PF14_0106;Pf_436_436     | 1.4683472       | Up         | -2.3654342      | Down       | -1.5139441     | Down       |
| Pfa3D7;chr10;PF10_0102;Pf_382_382     | -1.3739172      | Down       | -2.4523323      | Down       | -3.1449745     | Down       |
| Pfa3D7;chr11;PF11_0506;Pf_1149_1149   | -8.159957       | Down       | 13.63064        | Up         | 1.9020733      | Up         |
| Pfa3D7;chr11;PF11_0507;Pf_16267_16267 | -9.219649       | Down       | 18.883167       | Up         | 1.994017       | Up         |

| Accession number                       | [UT8] vs [UT16] |            | [UT16] vs [T16] |            | [UT8] vs [T16] |            |
|----------------------------------------|-----------------|------------|-----------------|------------|----------------|------------|
|                                        | Fold-change     | Regulation | Fold-change     | Regulation | Fold-change    | Regulation |
| Pfa3D7;chr11;PF11_0506;Pf_1612_1612    | -9.552233       | Down       | 13.888245       | Up         | 1.4566249      | Up         |
| Pfa3D7;chr11;PF11_0507;Pf_16307_16307  | -10.332231      | Down       | 13.265642       | Up         | 1.4026742      | Up         |
| Pfa3D7;chr14;PF14_0270;Pf_1100_1100    | -2.4729767      | Down       | 2.2484734       | Up         | -1.0965289     | Down       |
| Pfa3D7;chr14;PF14_0270;Pf_1497_1497    | -2.430713       | Down       | 2.0940263       | Up         | -1.0768716     | Down       |
| Pfa3D7;chr10;PF10_0332;Pf_405_405      | -1.2505171      | Down       | -1.6975592      | Down       | -2.069141      | Down       |
| Pfa3D7;chr11;PF11_0106;Pf_156_156      | 1.2180333       | Up         | 1.8744457       | Up         | 2.21173        | Up         |
| Pfa3D7;pfal_chr2;PFB0855c;Pf_3385_3385 | -2.0376177      | Down       | 2.0633554       | Up         | -1.0602692     | Down       |
| Pfa3D7;chr11;PF11_0338;Pf_548_548      | -3.7283804      | Down       | 2.9891593       | Up         | -1.0893573     | Down       |
| Pfa3D7;chr11;PF11_0338;Pf_350_350      | -4.0643654      | Down       | 3.3092272       | Up         | -1.1296593     | Down       |
| Pfa3D7;chr8;PF08_0060;Pf_6522_6522     | -9.667169       | Down       | 1.6204638       | Up         | -4.969221      | Down       |
| Pfa3D7;chr8;PF08_0060;Pf_6582_6582     | -9.026187       | Down       | 1.5992646       | Up         | -5.244675      | Down       |
| Pfa3D7;chr8;PF08_0060;Pf_6622_6622     | -9.176753       | Down       | 1.5697919       | Up         | -5.380583      | Down       |
| Pfa3D7;pfal_chr9;PFI1520w;Pf_781_781   | 1.2106135       | Up         | -7.1329007      | Down       | -6.141268      | Down       |
| Pfa3D7;pfal_chr5;PFE0475w;Pf_2093_2093 | -2.2880776      | Down       | 2.2255926       | Up         | -1.0407593     | Down       |
| Pfa3D7;pfal_chr5;PFE0475w;Pf_1434_1434 | -2.2870765      | Down       | 2.5448418       | Up         | 1.0802143      | Up         |
| Pfa3D7;chr13;MAL13P1.221;Pf_481_481    | -2.2544932      | Down       | 2.2969882       | Up         | -1.0349759     | Down       |
| Pfa3D7;chr13;MAL13P1.221;Pf_969_969    | -2.2511053      | Down       | 2.0951915       | Up         | -1.0347803     | Down       |
| Pfa3D7;pfal_chr5;PFE0715w;Pf_3089_3089 | -2.3607826      | Down       | 2.203268        | Up         | -1.1342673     | Down       |
| Pfa3D7;pfal_chr5;PFE0715w;Pf_3278_3278 | -2.9340024      | Down       | 2.253394        | Up         | -1.3439522     | Down       |
| Pfa3D7;chr8;PF08_0042;Pf_2495_2495     | 2.027157        | Up         | -1.6456604      | Down       | 1.2172412      | Up         |
| Pfa3D7;chr12;PFL1490w;Pf_2648_2648     | 2.1061456       | Up         | -1.8013475      | Down       | 1.1275156      | Up         |
| Pfa3D7;pfal_chr3;PFC0800w;Pf_1010_1010 | -3.6815503      | Down       | 4.362862        | Up         | 1.4162997      | Up         |
| Pfa3D7;pfal_chr3;PFC0800w;Pf_970_970   | -3.7346303      | Down       | 4.325012        | Up         | 1.2115644      | Up         |
| Pfa3D7;chr14;PF14_0241;Pf_252_252      | -1.4184198      | Down       | 2.120492        | Up         | 1.4446173      | Up         |
| Pfa3D7;pfal_chr1;PFA0400c;Pf_367_367   | -1.6726172      | Down       | 2.4000995       | Up         | 1.4753561      | Up         |
| Pfa3D7;pfal_chr1;PFA0400c;Pf_508_508   | -1.6067547      | Down       | 2.1722896       | Up         | 1.3905778      | Up         |
| Pfa3D7;pfal_chr2;PFB0505c;Pf_544_544   | 1.2886252       | Up         | -2.2049518      | Down       | -1.758629      | Down       |
| Pfa3D7;pfal_chr2;PFB0505c;Pf_959_959   | 1.0997043       | Up         | -2.060984       | Down       | -1.7587901     | Down       |
| Pfa3D7;chr14;PF14_0413;Pf_2410_2410    | -3.3524265      | Down       | 3.36279         | Up         | -1.0049971     | Down       |
| Pfa3D7;chr11;PF11_0239;Pf_4548_4548    | 1.7725319       | Up         | -2.3325188      | Down       | -1.355773      | Down       |
| Pfa3D7;chr11;PF11_0239;Pf_4616_4616    | 1.775415        | Up         | -2.422201       | Down       | -1.3991723     | Down       |
| Pfa3D7;chr12;PFL1845c;Pf_581_581       | -1.5329071      | Down       | 2.4329114       | Up         | 1.4986154      | Up         |
| Pfa3D7;chr12;PFL1845c;Pf_514_514       | -1.7502875      | Down       | 2.5791748       | Up         | 1.4281327      | Up         |
| Pfa3D7;chr14;PF14_0181;Pf_259_259      | -2.4171858      | Down       | 1.9200631       | Up         | -1.4591249     | Down       |
| Pfa3D7;pfal_chr5;PFE0980c;Pf_7371_7371 | -2.3933723      | Down       | 1.8939664       | Up         | -1.221793      | Down       |
| Pfa3D7;pfal_chr1;PFA0355w;Pf_811_811   | -2.142609       | Down       | 2.0217683       | Up         | -1.0855371     | Down       |
| Pfa3D7;pfal_chr5;PFE0195w;Pf_7083_7083 | -4.636446       | Down       | 5.8780956       | Up         | 1.2577496      | Up         |
| Pfa3D7;pfal_chr5;PFE0195w;Pf_7123_7123 | -4.5288863      | Down       | 6.3536763       | Up         | 1.4415079      | Up         |
| Pfa3D7;chr14;PF14_0374;Pf_3114_3114    | 5.4755526       | Up         | -2.5069032      | Down       | 2.1539216      | Up         |
| Pfa3D7;pfal_chr4;PFD0865c;Pf_2027_2027 | -2.9015431      | Down       | 1.9781057       | Up         | -1.3546076     | Down       |
| Pfa3D7;pfal_chr4;PFD0865c;Pf_1924_1924 | -2.9798071      | Down       | 1.8940889       | Up         | -1.542864      | Down       |
| Pfa3D7;chr12;PFL0800c;Pf_458_458       | -1.0260671      | Down       | -5.437529       | Down       | -4.860877      | Down       |
| Pfa3D7;chr12;PFL0800c;Pf_427_427       | -1.1652251      | Down       | -5.426187       | Down       | -5.0002947     | Down       |
| Pfa3D7;chr7;PF07_0034;Pf_674_674       | 1.8309605       | Up         | -2.3671343      | Down       | -1.2602533     | Down       |
| Pfa3D7;chr7;PF07_0034;Pf_842_842       | 1.5514245       | Up         | -2.4119093      | Down       | -1.4790652     | Down       |
| Pfa3D7;chr14;PF14_0346;Pf_2498_2498    | 2.015397        | Up         | -1.6689092      | Down       | 1.2935961      | Up         |
| Pfa3D7;chr12;PFL1545c;Pf_1749_1749     | -2.994795       | Down       | 4.1974277       | Up         | 1.3115172      | Up         |
| Pfa3D7;chr12;PFL2510w;Pf_1041_1041     | 1.643015        | Up         | -2.6208484      | Down       | -1.5289403     | Down       |
| Pfa3D7;chr14;PF14_0020;Pf_1059_1059    | -2.2037373      | Down       | 1.4462495       | Up         | -1.5240387     | Down       |
| Pfa3D7;chr14;PF14_0020;Pf_1149_1149    | -2.162159       | Down       | 1.3797529       | Up         | -1.5096707     | Down       |
| Pfa3D7;chr13;MAL13P1.86;Pf_2550_2550   | -2.2287762      | Down       | 2.117759        | Up         | -1.0260941     | Down       |
| Pfa3D7;chr13;MAL13P1.86;Pf_2630_2630   | -3.03728        | Down       | 2.644034        | Up         | -1.1053423     | Down       |
| Pfa3D7;chr6;PFF1105c;Pf_1441_1441      | -1.7644337      | Down       | 2.2830737       | Up         | 1.2790003      | Up         |
| Pfa3D7;pfal_chr3;PFC0210c;Pf_856_856   | -1.1478685      | Down       | -1.7996672      | Down       | -2.091482      | Down       |
| Pfa3D7;pfal_chr3;PFC0210c;Pf_1002_1002 | -1.0098943      | Down       | -1.9801376      | Down       | -2.0796504     | Down       |
| Pfa3D7;chr8;PF08_0063;Pf_2528_2528     | -2.1890388      | Down       | 2.397671        | Up         | 1.0168694      | Up         |

| Accession number                        | [UT8] vs [UT16] |            | [UT16] vs [T16] |            | [UT8] vs [T16] |            |
|-----------------------------------------|-----------------|------------|-----------------|------------|----------------|------------|
|                                         | Fold-change     | Regulation | Fold-change     | Regulation | Fold-change    | Regulation |
| Pfa3D7;chr8;PF08_0063;Pf_3068_3068      | -2.1271167      | Down       | 2.1125293       | Up         | 1.0580487      | Up         |
| Pfa3D7;chr11;PF11_0258;Pf_813_813       | -2.3289323      | Down       | 2.105642        | Up         | -1.0649086     | Down       |
| Pfa3D7;chr13;PF13_0180;Pf_709_709       | -3.0022783      | Down       | 3.0282195       | Up         | -1.020611      | Down       |
| Pfa3D7;chr13;PF13_0180;Pf_493_493       | -2.4538662      | Down       | 2.8499217       | Up         | 1.1165445      | Up         |
| Pfa3D7;pfal_chr4;PFD0075w;Pf_692_692    | -12.194834      | Down       | 26.870354       | Up         | 2.7173004      | Up         |
| Pfa3D7;pfal_chr4;PFD0075w;Pf_861_861    | -13.820117      | Down       | 24.788359       | Up         | 1.9616632      | Up         |
| Pfa3D7;chr8;MAL8P1.130;Pf_1138_1138     | -1.459589       | Down       | -1.4661175      | Down       | -2.1609893     | Down       |
| Pfa3D7;pfal_chr5;PFE0725c;Pf_373_373    | -1.5207398      | Down       | -1.9410533      | Down       | -2.5798047     | Down       |
| Pfa3D7;chr8;PF08_0097;Pf_1508_1508      | -3.5459006      | Down       | 1.9207126       | Up         | -1.9037209     | Down       |
| Pfa3D7;chr14;PF14_0325;Pf_833_833       | 2.0248637       | Up         | -2.1063783      | Down       | 1.0327139      | Up         |
| Pfa3D7;chr6;PFF0540c;Pf_463_463         | 1.0842373       | Up         | -2.4763675      | Down       | -2.4143996     | Down       |
| Pfa3D7;pfal_chr4;PFD0225w;Pf_12244_1224 | -2.71353        | Down       | 3.7513847       | Up         | 1.3670329      | Up         |
| Pfa3D7;chr13;MAL13P1.298;Pf_6312_6312   | 2.487792        | Up         | -1.8428885      | Down       | 1.3233564      | Up         |
| Pfa3D7;pfal_chr5;PFE1205c;Pf_224_224    | 1.5800968       | Up         | -2.3219914      | Down       | -1.5303856     | Down       |
| Pfa3D7;chr13;PF13_0172;Pf_1482_1482     | 1.7941933       | Up         | -3.0485024      | Down       | -1.7412454     | Down       |
| Pfa3D7;chr10;PF10_0211;Pf_13202_13202   | -3.1294944      | Down       | 2.5206063       | Up         | -1.1402872     | Down       |
| Pfa3D7;chr7;MAL7P1.31;Pf_363_363        | -2.0858319      | Down       | 2.370894        | Up         | 1.2015501      | Up         |
| Pfa3D7;chr12;PFL0220c;Pf_497_497        | -1.1497895      | Down       | -1.9433736      | Down       | -2.0543227     | Down       |
| Pfa3D7;chr14;PF14_0355;Pf_749_749       | 2.75447         | Up         | -1.9851663      | Down       | 1.2492992      | Up         |
| Pfa3D7;pfal_chr9;PFI0390c;Pf_934_934    | 1.6097925       | Up         | -2.1065776      | Down       | -1.4188228     | Down       |
| Pfa3D7;chr11;PF11_0333;Pf_4283_4283     | -2.4219465      | Down       | 1.4449693       | Up         | -1.677392      | Down       |
| Pfa3D7;chr7;PF07_0075;Pf_1294_1294      | -2.1014776      | Down       | 2.4763978       | Up         | 1.1606915      | Up         |
| Pfa3D7;pfal_chr4;PFD0225w;Pf_12121_1212 | -1.638824       | Down       | 2.8897648       | Up         | 1.6759803      | Up         |
| Pfa3D7;pfal_chr3;PFC0240c;Pf_2799_2799  | 2.4496427       | Up         | -2.0021162      | Down       | 1.1808063      | Up         |
| Pfa3D7;chr11;PF11_0167;Pf_175_175       | 2.5296443       | Up         | -2.6649942      | Down       | -1.0368993     | Down       |
| Pfa3D7;chr13;PF13_0230;Pf_2792_2792     | -2.6162026      | Down       | 2.3919704       | Up         | 1.0234826      | Up         |
| Pfa3D7;pfal_chr1;PFA0205w;Pf_2257_2257  | 1.2301638       | Up         | -2.0724106      | Down       | -1.6779047     | Down       |
| Pfa3D7;chr14;PF14_0607;Pf_2934_2934     | 2.0901983       | Up         | -1.5287286      | Down       | 1.4769276      | Up         |
| Pfa3D7;pfal_chr9;PFI1560c;Pf_3626_3626  | 2.7053678       | Up         | -2.7407746      | Down       | -1.0654181     | Down       |
| Pfa3D7;chr14;PF14_0315;Pf_16307_16307   | -2.1841793      | Down       | 1.9681735       | Up         | -1.1469578     | Down       |
| Pfa3D7;pfal_chr9;PFI1560c;Pf_3666_3666  | 3.3414366       | Up         | -2.7689488      | Down       | 1.0250536      | Up         |
| Pfa3D7;pfal_chr2;PFB0675w;Pf_4010_4010  | 2.1733637       | Up         | -2.0378308      | Down       | -1.0396227     | Down       |
| Pfa3D7;chr8;MAL8P1.139;Pf_17515_17515   | -1.0493094      | Down       | 2.148863        | Up         | 1.8133233      | Up         |
| Pfa3D7;chr14;PF14_0355;Pf_709_709       | 2.698312        | Up         | -1.998153       | Down       | 1.2824385      | Up         |
| Pfa3D7;chr10;PF10_0212;Pf_13219_13219   | -2.720801       | Down       | 2.3445463       | Up         | -1.1358635     | Down       |
| Pfa3D7;pfal_chr3;PFC0240c;Pf_2719_2719  | 2.5393207       | Up         | -1.9222726      | Down       | 1.24701        | Up         |
| Pfa3D7;chr7;MAL7P1.31;Pf_121_121        | -1.9573852      | Down       | 2.6235075       | Up         | 1.3174237      | Up         |
| Pfa3D7;chr8;MAL8P1.139;Pf_17662_17662   | -1.5390962      | Down       | 2.5128462       | Up         | 1.527843       | Up         |
| Pfa3D7;chr6;PFF0870w;Pf_2321_2321       | 2.2781224       | Up         | -1.7701235      | Down       | 1.4422482      | Up         |
| Pfa3D7;chr11;PF11_0347;Pf_2750_2750     | 2.5089602       | Up         | -1.8434294      | Down       | 1.3524292      | Up         |
| Pfa3D7;chr14;PF14_0251;Pf_280_280       | 2.8934305       | Up         | -1.9729391      | Down       | 1.3963441      | Up         |
| Pfa3D7;pfal_chr5;PFE1245w;Pf_1554_1554  | -3.096372       | Down       | 2.228078        | Up         | -1.323914      | Down       |
| Pfa3D7;pfal_chr1;PFA0570w;Pf_1773_1773  | -2.7393305      | Down       | 2.0090425       | Up         | -1.434231      | Down       |
| Pfa3D7;chr14;PF14_0567;Pf_924_924       | 2.1231096       | Up         | -1.5971124      | Down       | 1.2201458      | Up         |
| Pfa3D7;chr10;PF10_0233;Pf_1394_1394     | -3.457879       | Down       | 2.7720244       | Up         | -1.0197128     | Down       |
| Pfa3D7;chr13;MAL13P1.321;Pf_2367_2367   | 2.2188902       | Up         | -1.7250057      | Down       | 1.2022133      | Up         |
| Pfa3D7;chr12;PFL1300c;Pf_1301_1301      | -2.3619897      | Down       | 2.3405237       | Up         | 1.1062921      | Up         |
| Pfa3D7;chr12;PFL1865w;Pf_5342_5342      | -2.3375115      | Down       | 1.7336705       | Up         | -1.4572958     | Down       |
| Pfa3D7;chr12;PFL1505c;Pf_1015_1015      | 1.5265219       | Up         | -2.3088913      | Down       | -1.2831457     | Down       |
| Pfa3D7;chr14;PF14_0123;Pf_9560_9560     | 1.9153384       | Up         | -2.1919758      | Down       | -1.2892187     | Down       |
| Pfa3D7;chr8;PF08_0073;Pf_1120_1120      | 1.5687605       | Up         | -3.0573735      | Down       | -1.7617892     | Down       |
| Pfa3D7;chr14;PF14_0604;Pf_639_639       | 3.2176135       | Up         | -1.6307794      | Down       | 1.9108385      | Up         |
| Pfa3D7;chr13;MAL13P1.245;Pf_2041_2041   | -1.453476       | Down       | -1.6293346      | Down       | -2.2409256     | Down       |
| Pfa3D7;chr10;PF10_0290;Pf_1987_1987     | 1.6226395       | Up         | -4.7676497      | Down       | -2.9700522     | Down       |
| Pfa3D7;pfal_chr2;PFB0870w;Pf_6943_6943  | -3.2526383      | Down       | 3.2288299       | Up         | 1.0244713      | Up         |
| Pfa3D7;chr13;MAL13P1.295;Pf_5922_5922   | -3.1209555      | Down       | 3.5928621       | Up         | 1.1611558      | Up         |

| Accession number                         | [UT8] vs [UT16] |            | [UT16] vs [T16] |            | [UT8] vs [T16] |            |
|------------------------------------------|-----------------|------------|-----------------|------------|----------------|------------|
|                                          | Fold-change     | Regulation | Fold-change     | Regulation | Fold-change    | Regulation |
| Pfa3D7;chr6;PFF0470w;Pf_3051_3051        | -1.1339121      | Down       | -2.3466141      | Down       | -3.172841      | Down       |
| Pfa3D7;pfal_chr5;PFE0510c;Pf_461_461     | 1.0197475       | Up         | -2.038583       | Down       | -1.7200577     | Down       |
| Pfa3D7;pfal_chr5;PFE0360c;Pf_2225_2225   | 1.8123494       | Up         | -2.308158       | Down       | -1.2351495     | Down       |
| Pfa3D7;chr6;PFF1075w;Pf_2360_2360        | 1.3064096       | Up         | -2.3468223      | Down       | -2.05641       | Down       |
| Pfa3D7;pfal_chr1;PFA0395c;Pf_536_536     | -2.125153       | Down       | 1.4563439       | Up         | -1.5392894     | Down       |
| Pfa3D7;chr14;PF14_0480;Pf_4788_4788      | 1.3239088       | Up         | -2.165703       | Down       | -1.7515129     | Down       |
| Pfa3D7;chr13;MAL13P1.150;Pf_1401_1401    | -1.9512608      | Down       | 2.128485        | Up         | 1.0743003      | Up         |
| Pfa3D7;chr6;PFF1045w;Pf_4679_4679        | -2.0493627      | Down       | 1.9200045       | Up         | -1.0515796     | Down       |
| Pfa3D7;pfal_chr5;PFE0950c;Pf_441_441     | 1.2725631       | Up         | -2.5564165      | Down       | -1.979042      | Down       |
| Pfa3D7;chr12;PFL2505c;Pf_6559_6559       | 2.0831475       | Up         | 1.2483258       | Up         | 2.712758       | Up         |
| Pfa3D7;chr14;PF14_0204;Pf_3702_3702      | 2.5193393       | Up         | -1.5930934      | Down       | 1.6027039      | Up         |
| Pfa3D7;chr14;PF14_0705;Pf_93_93          | -2.235142       | Down       | 3.057183        | Up         | 1.3151298      | Up         |
| Pfa3D7;pfal_chr3;PFC0335c;Pf_10822_10822 | -2.2458634      | Down       | 1.8171453       | Up         | -1.1738143     | Down       |
| Pfa3D7;pfal_chr2;PFB0485c;Pf_1095_1095   | 2.3034587       | Up         | -1.7295959      | Down       | 1.316137       | Up         |
| Pfa3D7;pfal_chr2;PFB0475c;Pf_1135_1135   | 1.7133087       | Up         | -2.02823        | Down       | 1.0010424      | Up         |
| Pfa3D7;pfal_chr5;PFE0360c;Pf_2305_2305   | 1.7565185       | Up         | -2.2246747      | Down       | -1.1336026     | Down       |
| Pfa3D7;chr12;PFL1750c;Pf_4236_4236       | 1.2022638       | Up         | -2.3425746      | Down       | -1.934091      | Down       |
| Pfa3D7;chr10;PF10_0065;Pf_765_765        | -2.3950076      | Down       | 1.8266475       | Up         | -1.4181448     | Down       |
| Pfa3D7;chr11;PF11_0413;Pf_859_859        | -3.3845735      | Down       | 3.016375        | Up         | 1.0345641      | Up         |
| Pfa3D7;pfal_chr9;PFI0915w;Pf_2107_2107   | 5.414765        | Up         | -2.8087332      | Down       | 2.0203655      | Up         |
| Pfa3D7;pfal_chr4;PFD0345c;Pf_1083_1083   | 2.2047071       | Up         | -1.459738       | Down       | 1.3567246      | Up         |
| Pfa3D7;chr8;PFO8_0058;Pf_2748_2748       | 1.5788448       | Up         | -2.2434826      | Down       | -1.264152      | Down       |
| Pfa3D7;chr13;PF13_0281;Pf_320_320        | -3.487465       | Down       | 3.510305        | Up         | -1.0009038     | Down       |
| Pfa3D7;chr13;MAL13P1.201;Pf_1661_1661    | -2.2315667      | Down       | 3.2112892       | Up         | 1.2284651      | Up         |
| Pfa3D7;pfal_chr9;PFI0445c;Pf_1337_1337   | 1.361759        | Up         | -2.3442857      | Down       | -1.8419223     | Down       |
| Pfa3D7;chr13;MAL13P1.24;Pf_546_546       | 1.4412998       | Up         | -2.3808703      | Down       | -1.7222435     | Down       |
| Pfa3D7;chr13;MAL13P1.342;Pf_1666_1666    | -1.0174838      | Down       | -1.8935769      | Down       | -2.3009746     | Down       |
| Pfa3D7;chr13;PF13_0060;Pf_1411_1411      | 2.5170603       | Up         | -3.0885544      | Down       | -1.388806      | Down       |
| Pfa3D7;pfal_chr9;PFI0795w;Pf_3237_3237   | -2.883798       | Down       | 1.9637502       | Up         | -1.5416449     | Down       |
| Pfa3D7;chr12;PFL0260c;Pf_835_835         | 1.3307353       | Up         | -2.0683992      | Down       | -1.394638      | Down       |
| Pfa3D7;pfal_chr2;PFB0235w;Pf_1737_1737   | 1.2580305       | Up         | -2.5833943      | Down       | -2.088197      | Down       |
| Pfa3D7;chr10;PF10_0292;Pf_4760_4760      | 1.4009894       | Up         | -2.06996        | Down       | -1.3364611     | Down       |
| Pfa3D7;chr10;PF10_0060;Pf_1826_1826      | 1.3254702       | Up         | -2.072438       | Down       | -1.5459478     | Down       |
| Pfa3D7;chr8;MAL8P1.45;Pf_2463_2463       | 1.4922093       | Up         | -2.2455125      | Down       | -1.5461406     | Down       |
| Pfa3D7;pfal_chr5;PFE1000c;Pf_1518_1518   | -2.359844       | Down       | 1.5486403       | Up         | -1.6016287     | Down       |
| Pfa3D7;chr14;PF14_0367;Pf_1939_1939      | 1.1308471       | Up         | -2.3092177      | Down       | -2.091067      | Down       |
| Pfa3D7;chr12;PFL2120w;Pf_3795_3795       | -2.0678117      | Down       | 1.5464563       | Up         | -1.325372      | Down       |
| Pfa3D7;pfal_chr4;PFD0375w;Pf_3538_3538   | -1.1810561      | Down       | -2.3587506      | Down       | -2.542639      | Down       |
| Pfa3D7;chr13;PF13_0020;Pf_1777_1777      | 1.4695975       | Up         | -2.0860112      | Down       | -1.501123      | Down       |
| Pfa3D7;pfal_chr9;PFI0670w;Pf_1773_1773   | -2.1578004      | Down       | 1.6976862       | Up         | -1.3098756     | Down       |
| Pfa3D7;chr11;PF11_0379;Pf_1202_1202      | 2.5271354       | Up         | -2.293515       | Down       | 1.1053368      | Up         |
| Pfa3D7;chr7;PFO7_0114;Pf_2551_2551       | -2.167884       | Down       | 1.8309121       | Up         | -1.2489637     | Down       |
| Pfa3D7;pfal_chr5;PFE0575c;Pf_407_407     | 1.5508038       | Up         | 1.4893085       | Up         | 2.6212122      | Up         |
| Pfa3D7;chr14;PF14_0338;Pf_2643_2643      | -2.0338137      | Down       | 1.6385677       | Up         | -1.1664828     | Down       |
| Pfa3D7;chr13;MAL13P1.180;Pf_771_771      | -2.2920616      | Down       | 2.1656096       | Up         | -1.124952      | Down       |
| Pfa3D7;pfal_chr9;PFI1410c;Pf_4104_4104   | -2.145148       | Down       | 2.1933796       | Up         | -1.0501908     | Down       |
| Pfa3D7;chr14;PF14_0385;Pf_978_978        | 1.0757954       | Up         | -2.0481124      | Down       | -1.850647      | Down       |
| Pfa3D7;chr14;PF14_0674;Pf_1681_1681      | -2.488227       | Down       | 2.0402384       | Up         | -1.142923      | Down       |
| Pfa3D7;chr14;PF14_0574;Pf_893_893        | 2.075257        | Up         | -2.1005125      | Down       | 1.0242848      | Up         |
| Pfa3D7;chr12;PFL1300c;Pf_1221_1221       | -2.651945       | Down       | 2.3902016       | Up         | 1.0158886      | Up         |
| Pfa3D7;chr13;PF13_0162;Pf_5282_5282      | 2.7846828       | Up         | -2.1253338      | Down       | 1.3414156      | Up         |
| Pfa3D7;chr12;PFL1460c;Pf_632_632         | -1.1123654      | Down       | -2.3119462      | Down       | -2.2737331     | Down       |
| Pfa3D7;chr13;PF13_0220;Pf_1098_1098      | -1.6392303      | Down       | -2.0629098      | Down       | -3.2390532     | Down       |
| Pfa3D7;chr14;PF14_0556;Pf_3939_3939      | 2.003999        | Up         | -1.3465433      | Down       | 1.4798154      | Up         |
| Pfa3D7;chr14;PF14_0567;Pf_964_964        | 2.013246        | Up         | -1.7011122      | Down       | 1.1048726      | Up         |
| Pfa3D7;chr13;MAL13P1.138;Pf_1904_1904    | -1.4913418      | Down       | 2.0064967       | Up         | 1.5075927      | Up         |

| Accession number                        | [UT8] vs [UT16] |            | [UT16] vs [T16] |            | [UT8] vs [T16] |            |
|-----------------------------------------|-----------------|------------|-----------------|------------|----------------|------------|
|                                         | Fold-change     | Regulation | Fold-change     | Regulation | Fold-change    | Regulation |
| Pfa3D7;chr12;PFL2450c;Pf_184_184        | -1.7357284      | Down       | -2.5045135      | Down       | -3.5661173     | Down       |
| Pfa3D7;pfal_chr2;PFB0205c;Pf_3348_3348  | -2.6033764      | Down       | 2.5140395       | Up         | -1.0815765     | Down       |
| Pfa3D7;pfal_chr3;PFC0370w;Pf_1310_1310  | 1.4458978       | Up         | -2.1024404      | Down       | -1.3287549     | Down       |
| Pfa3D7;pfal_chr9;PFI1035w;Pf_519_519    | -2.5109115      | Down       | 1.9791793       | Up         | -1.3624438     | Down       |
| Pfa3D7;chr10;PF10_0233;Pf_1580_1580     | -3.6503048      | Down       | 3.7899323       | Up         | 1.126109       | Up         |
| Pfa3D7;chr14;PF14_0668;Pf_6927_6927     | -1.9150593      | Down       | 2.4585607       | Up         | 1.2727687      | Up         |
| Pfa3D7;chr13;PF13_0307;Pf_3269_3269     | -1.8448275      | Down       | 2.0592709       | Up         | 1.0456463      | Up         |
| Pfa3D7;chr12;PFL2220w;Pf_2602_2602      | 2.0525985       | Up         | -2.2338526      | Down       | -1.1344739     | Down       |
| Pfa3D7;pfal_chr3;PFC0620w;Pf_1617_1617  | 1.4129668       | Up         | -3.4813683      | Down       | -2.6225712     | Down       |
| Pfa3D7;pfal_chr1;PFA0210c;Pf_1200_1200  | -1.78602        | Down       | 2.573638        | Up         | 1.6900313      | Up         |
| Pfa3D7;pfal_chr5;PFE1200w;Pf_3623_3623  | 2.1799974       | Up         | -1.4882673      | Down       | 1.2938886      | Up         |
| Pfa3D7;chr11;PF11_0231;Pf_781_781       | 1.7283945       | Up         | -2.0769548      | Down       | -1.1657658     | Down       |
| Pfa3D7;chr14;PF14_0574;Pf_853_853       | 2.180883        | Up         | -2.0946236      | Down       | 1.0643551      | Up         |
| Pfa3D7;chr6;PFF0280w;Pf_697_697         | -1.1094933      | Down       | -2.7515697      | Down       | -3.4417837     | Down       |
| Pfa3D7;chr13;PF13_0192;Pf_1839_1839     | -2.3078833      | Down       | 4.931361        | Up         | 1.9490895      | Up         |
| Pfa3D7;chr11;PF11_0347;Pf_2935_2935     | 3.0686858       | Up         | -1.9175947      | Down       | 1.5745515      | Up         |
| Pfa3D7;pfal_chr2;PFB0745w;Pf_3960_3960  | -1.0875136      | Down       | 2.2082977       | Up         | 2.0336215      | Up         |
| Pfa3D7;pfal_chr5;PFE1025c;Pf_845_845    | -1.466461       | Down       | 2.146791        | Up         | 1.3575158      | Up         |
| Pfa3D7;pfal_chr2;PFB0745w;Pf_3872_3872  | -1.0480311      | Down       | 2.0971239       | Up         | 1.9286996      | Up         |
| Pfa3D7;chr6;PFF0405c;Pf_495_495         | -2.1488671      | Down       | 3.4136817       | Up         | 1.6104767      | Up         |
| Pfa3D7;pfal_chr9;PFI1265w;Pf_4973_4973  | -2.4035482      | Down       | 2.0670967       | Up         | -1.1228312     | Down       |
| Pfa3D7;chr11;PF11_0073;Pf_1878_1878     | -2.2720525      | Down       | 2.4630928       | Up         | 1.0941311      | Up         |
| Pfa3D7;pfal_chr3;PFC0370w;Pf_1247_1247  | 1.365811        | Up         | -2.1892424      | Down       | -1.411643      | Down       |
| Pfa3D7;chr12;PFL1195w;Pf_901_901        | 3.324977        | Up         | -2.241224       | Down       | 1.3746378      | Up         |
| Pfa3D7;chr13;MAL13P1.268;Pf_1558_1558   | 8.198259        | Up         | -2.8800545      | Down       | 2.7292273      | Up         |
| Pfa3D7;chr6;PFF0130c;Pf_1262_1262       | 2.0122857       | Up         | -2.205031       | Down       | -1.1270123     | Down       |
| Pfa3D7;pfal_chr4;PFD0695w;Pf_724_724    | 1.1781875       | Up         | -2.6530912      | Down       | -2.8068068     | Down       |
| Pfa3D7;chr8;MAL8P1.95;Pf_781_781        | -1.4678305      | Down       | 2.5537794       | Up         | 1.7525499      | Up         |
| Pfa3D7;chr14;PF14_0204;Pf_3499_3499     | 2.9899666       | Up         | -1.7385557      | Down       | 1.7279221      | Up         |
| Pfa3D7;pfal_chr5;PFE1375c;Pf_1210_1210  | -1.5440308      | Down       | -1.4967217      | Down       | -2.1718602     | Down       |
| Pfa3D7;chr13;MAL13P1.150;Pf_1361_1361   | -2.075837       | Down       | 2.2474072       | Up         | -1.0118394     | Down       |
| Pfa3D7;chr14;PF14_0074;Pf_1094_1094     | 2.119543        | Up         | -3.7081258      | Down       | -1.6840477     | Down       |
| Pfa3D7;chr14;PF14_0319;Pf_7767_7767     | -2.012649       | Down       | 2.1778588       | Up         | 1.0327502      | Up         |
| Pfa3D7;chr12;PFL0895c;Pf_2915_2915      | 2.2395382       | Up         | -1.9199349      | Down       | 1.1687027      | Up         |
| Pfa3D7;chr7;MAL7P1.77;Pf_1491_1491      | -2.2289839      | Down       | 3.901374        | Up         | 1.6700565      | Up         |
| Pfa3D7;pfal_chr3;PFC0910w;Pf_1143_1143  | -5.8945646      | Down       | 2.4085102       | Up         | -2.3159046     | Down       |
| Pfa3D7;chr14;PF14_0318;Pf_5876_5876     | -2.1444314      | Down       | 2.6628892       | Up         | 1.2026505      | Up         |
| Pfa3D7;pfal_chr9;PFI0270w;Pf_633_633    | 1.9054562       | Up         | -2.0105422      | Down       | 1.0191371      | Up         |
| Pfa3D7;chr10;PF10_0338;Pf_318_318       | -2.6767695      | Down       | 2.179858        | Up         | -1.2207316     | Down       |
| Pfa3D7;chr14;PF14_0693;Pf_444_444       | -1.0904939      | Down       | -1.8939296      | Down       | -2.0015638     | Down       |
| Pfa3D7;chr8;PF08_0082;Pf_1796_1796      | 1.5226419       | Up         | -2.0834534      | Down       | -1.377953      | Down       |
| Pfa3D7;chr13;MAL13P1.114;Pf_10267_10267 | 2.239639        | Up         | -1.6781163      | Down       | 1.3560454      | Up         |
| Pfa3D7;pfal_chr3;PFC0910w;Pf_1185_1185  | -6.155904       | Down       | 2.376356        | Up         | -2.4269462     | Down       |
| Pfa3D7;chr10;PF10_0152;Pf_1681_1681     | -3.8390927      | Down       | 2.5692847       | Up         | -1.3826755     | Down       |
| Pfa3D7;chr6;PFF0130c;Pf_1208_1208       | 2.2339737       | Up         | -2.224762       | Down       | -1.1100858     | Down       |
| Pfa3D7;pfal_chr2;PFB0256w;Pf_43_43      | 2.479601        | Up         | -1.4361415      | Down       | 1.6117946      | Up         |
| Pfa3D7;chr13;PF13_0020;Pf_1737_1737     | 1.1254805       | Up         | -2.04868        | Down       | -1.8393741     | Down       |
| Pfa3D7;chr12;PFL0280c;Pf_824_824        | -2.1764357      | Down       | 2.1568553       | Up         | -1.0107249     | Down       |
| Pfa3D7;chr10;PF10_0307;Pf_2524_2524     | -3.024696       | Down       | 1.3854867       | Up         | -1.9720818     | Down       |
| Pfa3D7;pfal_chr2;PFB0115w;Pf_3476_3476  | -15.588168      | Down       | 4.8041644       | Up         | -2.7407916     | Down       |
| Pfa3D7;chr14;PF14_0152;Pf_4148_4148     | -2.86094        | Down       | 1.91302         | Up         | -1.324698      | Down       |
| Pfa3D7;pfal_chr2;PFB0485c;Pf_1055_1055  | 2.4100804       | Up         | -1.8190596      | Down       | 1.2275         | Up         |
| Pfa3D7;chr8;MAL8P1.62;Pf_513_513        | -2.179053       | Down       | 1.8871645       | Up         | -1.0343457     | Down       |
| Pfa3D7;chr11;PF11_0346;Pf_1726_1726     | 2.4946024       | Up         | -2.1557558      | Down       | 1.1227518      | Up         |
| Pfa3D7;chr10;PF10_0265;Pf_5330_5330     | 1.1378089       | Up         | -2.1352613      | Down       | -1.9801679     | Down       |
| Pfa3D7;chr6;PFF1045w;Pf_4565_4565       | -2.3128693      | Down       | 1.9654828       | Up         | -1.1687198     | Down       |

| Accession number                       | [UT8] vs [UT16] |            | [UT16] vs [T16] |            | [UT8] vs [T16] |            |
|----------------------------------------|-----------------|------------|-----------------|------------|----------------|------------|
|                                        | Fold-change     | Regulation | Fold-change     | Regulation | Fold-change    | Regulation |
| Pfa3D7;chr6;PFF0480w;Pf_5605_5605      | 2.1094427       | Up         | -2.1983774      | Down       | -1.1068486     | Down       |
| Pfa3D7;chr13;MAL13P1.138;Pf_1944_1944  | -1.6344         | Down       | 2.9162056       | Up         | 1.561242       | Up         |
| Pfa3D7;pfal_chr5;PFE0875c;Pf_2388_2388 | -1.1583172      | Down       | -1.9861207      | Down       | -2.1932018     | Down       |
| Pfa3D7;pfal_chr5;PFE0190c;Pf_1903_1903 | -2.3047104      | Down       | 2.5632048       | Up         | 1.0356302      | Up         |
| Pfa3D7;chr14;PF14_0310;Pf_2112_2112    | -2.325782       | Down       | 1.7025963       | Up         | -1.3588988     | Down       |
| Pfa3D7;pfal_chr4;PFD0550c;Pf_402_402   | -2.2344782      | Down       | 2.029834        | Up         | -1.1775949     | Down       |
| Pfa3D7;chr8;PF08_0083;Pf_1620_1620     | 2.055147        | Up         | -1.8739142      | Down       | 1.1189641      | Up         |
| Pfa3D7;chr11;PF11_0056;Pf_1842_1842    | -1.2411649      | Down       | -1.8102573      | Down       | -2.185566      | Down       |
| Pfa3D7;chr14;PF14_0037;Pf_366_366      | -2.502586       | Down       | 2.274246        | Up         | -1.0257112     | Down       |
| Pfa3D7;chr12;PFL0825c;Pf_659_659       | 1.1333438       | Up         | -2.0592103      | Down       | -1.819696      | Down       |
| Pfa3D7;chr13;MAL13P1.15;Pf_177_177     | -2.3781395      | Down       | 2.501529        | Up         | 1.1382478      | Up         |
| Pfa3D7;chr11;PF11_0193;Pf_687_687      | 1.0857314       | Up         | -2.065223       | Down       | -1.6326104     | Down       |
| Pfa3D7;pfal_chr4;PFD0555c;Pf_3637_3637 | -2.9490793      | Down       | 2.0055792       | Up         | -1.4333793     | Down       |
| Pfa3D7;chr11;PF11_0460;Pf_1712_1712    | -1.1300702      | Down       | -2.4441464      | Down       | -2.4093862     | Down       |
| Pfa3D7;chr13;PF13_0266;Pf_582_582      | -1.70597        | Down       | -1.7940912      | Down       | -2.6438239     | Down       |
| Pfa3D7;chr8;MAL8P1.62;Pf_473_473       | -2.3662481      | Down       | 1.8157268       | Up         | -1.1082267     | Down       |
| Pfa3D7;chr13;MAL13P1.306;Pf_890_890    | 2.031788        | Up         | -1.4571385      | Down       | 1.5413362      | Up         |
| Pfa3D7;pfal_chr5;PFE1025c;Pf_805_805   | -1.5769109      | Down       | 2.1905832       | Up         | 1.3012533      | Up         |
| Pfa3D7;chr8;MAL8P1.107;Pf_327_327      | -4.861114       | Down       | 3.0664113       | Up         | -1.4047272     | Down       |
| Pfa3D7;chr13;MAL13P1.268;Pf_1458_1458  | 7.9734416       | Up         | -2.8630388      | Down       | 2.6858702      | Up         |
| Pfa3D7;chr13;PF13_0164;Pf_2067_2067    | 1.0280595       | Up         | -2.0330067      | Down       | -2.0276618     | Down       |
| Pfa3D7;chr13;MAL13P1.295;Pf_5862_5862  | -3.541323       | Down       | 3.6774232       | Up         | 1.0797532      | Up         |
| Pfa3D7;chr8;MAL8P1.100;Pf_1362_1362    | 1.2826602       | Up         | -2.2623885      | Down       | -1.9587573     | Down       |
| Pfa3D7;chr14;PF14_0168;Pf_982_982      | -1.2650903      | Down       | -2.5769913      | Down       | -3.0317621     | Down       |
| Pfa3D7;chr11;PF11_0413;Pf_900_900      | -3.4788527      | Down       | 2.9707983       | Up         | -1.1292884     | Down       |
| Pfa3D7;chr14;PF14_0728;Pf_30_30        | 2.063737        | Up         | -1.2725619      | Down       | 1.5449829      | Up         |
| Pfa3D7;chr13;PF13_0210;Pf_9546_9546    | 1.2167625       | Up         | 1.8727623       | Up         | 2.1834102      | Up         |
| Pfa3D7;pfal_chr5;PFE1480c;Pf_2849_2849 | -2.3270223      | Down       | 1.7882396       | Up         | -1.330194      | Down       |
| Pfa3D7;chr13;PF13_0267;Pf_1431_1431    | -1.4975029      | Down       | -2.2365658      | Down       | -3.5841815     | Down       |
| Pfa3D7;chr7;MAL7P1.76;Pf_2238_2238     | 1.7508675       | Up         | -2.529043       | Down       | -1.4171363     | Down       |
| Pfa3D7;pfal_chr5;PFE0575c;Pf_492_492   | 1.8462582       | Up         | 1.3760643       | Up         | 2.630593       | Up         |
| Pfa3D7;pfal_chr4;PFD0435c;Pf_622_622   | -1.0306196      | Down       | -6.5201354      | Down       | -7.231573      | Down       |
| Pfa3D7;pfal_chr3;PFC1025w;Pf_53_53     | -1.6852086      | Down       | 2.1137938       | Up         | 1.3088828      | Up         |
| Pfa3D7;pfal_chr1;PFA0570w;Pf_1733_1733 | -2.8696988      | Down       | 1.9350348       | Up         | -1.4285156     | Down       |
| Pfa3D7;chr14;PF14_0367;Pf_2019_2019    | -1.0174985      | Down       | -2.3456755      | Down       | -2.2010825     | Down       |
| Pfa3D7;chr8;MAL8P1.77;Pf_327_327       | -2.2951832      | Down       | 1.8741295       | Up         | -1.2140396     | Down       |
| Pfa3D7;chr14;PF14_0319;Pf_7860_7860    | -2.0813417      | Down       | 2.168756        | Up         | 1.1340901      | Up         |
| Pfa3D7;chr14;PF14_0544;Pf_1955_1955    | -3.8385346      | Down       | 1.956998        | Up         | -1.6201093     | Down       |
| Pfa3D7;chr6;PFF0705c;Pf_1247_1247      | 1.3008639       | Up         | -2.1062555      | Down       | -1.507767      | Down       |
| Pfa3D7;chr12;PFL0700w;Pf_440_440       | -1.4903053      | Down       | -1.7503757      | Down       | -2.344701      | Down       |
| Pfa3D7;chr7;PF07_0055;Pf_1986_1986     | 1.0048364       | Up         | -2.0575166      | Down       | -2.0657897     | Down       |
| Pfa3D7;pfal_chr9;PFI0915w;Pf_2027_2027 | 6.0203905       | Up         | -2.7883196      | Down       | 2.2352736      | Up         |
| Pfa3D7;chr14;PF14_0412;Pf_2341_2341    | -2.0715125      | Down       | 2.2688704       | Up         | 1.0524262      | Up         |
| Pfa3D7;chr7;PF07_0087;Pf_437_437       | -2.608415       | Down       | 6.2871003       | Up         | 2.4342906      | Up         |
| Pfa3D7;pfal_chr9;PFI0140w;Pf_187_187   | 5.027686        | Up         | -2.7643745      | Down       | 1.838805       | Up         |
| Pfa3D7;pfal_chr9;PFI0800c;Pf_87_87     | 2.7102706       | Up         | -2.644934       | Down       | 1.1585749      | Up         |
| Pfa3D7;pfal_chr9;PFI1265w;Pf_5013_5013 | -2.1956697      | Down       | 1.8960698       | Up         | -1.0039716     | Down       |
| Pfa3D7;pfal_chr3;PFC0215c;Pf_1254_1254 | 1.1147405       | Up         | -3.2480285      | Down       | -2.5391889     | Down       |
| Pfa3D7;chr12;PFL2220w;Pf_2504_2504     | 2.0803833       | Up         | -2.1871085      | Down       | -1.0937746     | Down       |
| Pfa3D7;pfal_chr9;PFI0795w;Pf_3337_3337 | -2.7509863      | Down       | 1.9969801       | Up         | -1.4524794     | Down       |
| Pfa3D7;chr8;PF08_0073;Pf_717_717       | -1.5142998      | Down       | -3.0996578      | Down       | -4.0258875     | Down       |
| Pfa3D7;chr13;MAL13P1.201;Pf_1701_1701  | -2.0983756      | Down       | 2.2877488       | Up         | 1.0063         | Up         |
| Pfa3D7;pfal_chr9;PFI0825w;Pf_747_747   | 2.3493624       | Up         | -1.6329323      | Down       | 1.4024581      | Up         |
| Pfa3D7;chr12;PFL0485w;Pf_531_531       | -2.193234       | Down       | 2.128111        | Up         | -1.1022815     | Down       |
| Pfa3D7;pfal_chr5;PFE0320w;Pf_2672_2672 | -2.2410514      | Down       | 1.5399895       | Up         | -1.4094402     | Down       |
| Pfa3D7;chr12;PFL2130w;Pf_3929_3929     | -1.9135183      | Down       | 2.2054274       | Up         | 1.2653035      | Up         |

| Accession number                         | [UT8] vs [UT16] |            | [UT16] vs [T16] |            | [UT8] vs [T16] |            |
|------------------------------------------|-----------------|------------|-----------------|------------|----------------|------------|
|                                          | Fold-change     | Regulation | Fold-change     | Regulation | Fold-change    | Regulation |
| Pfa3D7;pfal_chr5;PFE1245w;Pf_1442_1442   | -3.222364       | Down       | 2.327803        | Up         | -1.2770815     | Down       |
| Pfa3D7;chr11;PF11_0166;Pf_604_604        | 2.175965        | Up         | -1.6188684      | Down       | 1.4096932      | Up         |
| Pfa3D7;chr8;MAL8P1.15;Pf_3034_3034       | -3.7345593      | Down       | 3.4003496       | Up         | 1.0178066      | Up         |
| Pfa3D7;chr11;PF11_0135;Pf_279_279        | 1.0324565       | Up         | -2.1077554      | Down       | -1.8166064     | Down       |
| Pfa3D7;pfal_chr3;PFC0335c;Pf_11048_11048 | -2.0174298      | Down       | 1.6640418       | Up         | -1.2535344     | Down       |
| Pfa3D7;chr7;PF07_0041;Pf_1292_1292       | 2.2209904       | Up         | -1.9958684      | Down       | 1.1155202      | Up         |
| Pfa3D7;chr12;PFL1195w;Pf_723_723         | 3.4434686       | Up         | -2.062609       | Down       | 1.5078741      | Up         |
| Pfa3D7;chr7;MAL7P1.117;Pf_115_115        | -1.2951043      | Down       | 2.0388384       | Up         | 1.4870093      | Up         |
| Pfa3D7;pfal_chr3;PFC0695w;Pf_701_701     | 2.9368665       | Up         | -3.5259972      | Down       | -1.1991571     | Down       |
| Pfa3D7;chr14;PF14_0674;Pf_1498_1498      | -2.209476       | Down       | 1.9824687       | Up         | -1.1829194     | Down       |
| Pfa3D7;chr6;PFF1195c;Pf_1791_1791        | 1.0043459       | Up         | -2.0370216      | Down       | -1.9277321     | Down       |
| Pfa3D7;chr12;PFL0280c;Pf_904_904         | -1.9616483      | Down       | 2.1163301       | Up         | 1.1017238      | Up         |
| Pfa3D7;pfal_chr2;PFB0670c;Pf_745_745     | 1.4939066       | Up         | -2.3126504      | Down       | -1.3747518     | Down       |
| Pfa3D7;chr14;PF14_0623;Pf_613_613        | 1.2971467       | Up         | -2.0200427      | Down       | -1.6355338     | Down       |
| Pfa3D7;chr13;PF13_0162;Pf_5462_5462      | 2.6849582       | Up         | -2.153844       | Down       | 1.2481122      | Up         |
| Pfa3D7;chr13;PF13_0217;Pf_71_71          | -2.0654166      | Down       | 1.6773208       | Up         | -1.1292648     | Down       |
| Pfa3D7;chr14;PF14_0402;Pf_5463_5463      | -4.2810955      | Down       | 2.663529        | Up         | -1.6615108     | Down       |
| Pfa3D7;pfal_chr1;PFA0255c;Pf_1517_1517   | -3.2488947      | Down       | 2.4893172       | Up         | -1.3755282     | Down       |
| Pfa3D7;chr8;MAL8P1.74;Pf_2018_2018       | -2.410055       | Down       | 1.4014097       | Up         | -1.6707544     | Down       |
| Pfa3D7;chr13;MAL13P1.180;Pf_820_820      | -2.2032497      | Down       | 2.0702062       | Up         | -1.1075369     | Down       |
| Pfa3D7;chr11;PF11_0166;Pf_775_775        | 3.4010103       | Up         | -1.9491068      | Down       | 1.7606803      | Up         |
| Pfa3D7;chr13;MAL13P1.188;Pf_1726_1726    | 1.1792319       | Up         | -2.2170558      | Down       | -2.0085113     | Down       |
| Pfa3D7;chr14;PF14_0080;Pf_238_238        | 1.0416987       | Up         | -2.7134123      | Down       | -2.595463      | Down       |
| Pfa3D7;pfal_chr1;PFA0255c;Pf_1637_1637   | -2.761186       | Down       | 2.4533143       | Up         | -1.1685779     | Down       |
| Pfa3D7;pfal_chr4;PFD1130w;Pf_957_957     | 1.3985918       | Up         | 1.3908315       | Up         | 2.3919344      | Up         |
| Pfa3D7;chr6;PFF0490w;Pf_5992_5992        | 2.638169        | Up         | -1.8035185      | Down       | 1.2809546      | Up         |
| Pfa3D7;chr10;PF10_0265;Pf_5370_5370      | 1.2987314       | Up         | -2.1977036      | Down       | -2.0479448     | Down       |
| Pfa3D7;chr14;PF14_0279;Pf_690_690        | -2.605408       | Down       | 2.3317027       | Up         | -1.1496888     | Down       |
| Pfa3D7;chr14;PF14_0604;Pf_691_691        | 2.5686777       | Up         | -1.7431523      | Down       | 1.4472121      | Up         |
| Pfa3D7;chr11;PF11_0482;Pf_3956_3956      | -1.4346126      | Down       | 2.0522795       | Up         | 1.385855       | Up         |
| Pfa3D7;chr14;PF14_0168;Pf_475_475        | -1.2972084      | Down       | -2.600482       | Down       | -3.1694489     | Down       |
| Pfa3D7;pfal_chr9;PFI1230c;Pf_969_969     | -1.7377114      | Down       | -1.7926673      | Down       | -2.9994354     | Down       |
| Pfa3D7;pfal_chr5;PFE1200w;Pf_3540_3540   | 2.294894        | Up         | -1.4959569      | Down       | 1.3626685      | Up         |
| Pfa3D7;chr12;PFL1415w;Pf_2788_2788       | -3.1323504      | Down       | 1.6370821       | Up         | -1.7872833     | Down       |
| Pfa3D7;pfal_chr4;PFD0205c;Pf_416_416     | -1.4367985      | Down       | -1.5266703      | Down       | -2.033776      | Down       |
| Pfa3D7;pfal_chr4;PFD0545w;Pf_4537_4537   | -1.363121       | Down       | -1.5841752      | Down       | -2.2073922     | Down       |
| Pfa3D7;chr10;PF10_0258;Pf_428_428        | -1.417901       | Down       | -1.7613934      | Down       | -2.2332287     | Down       |
| Pfa3D7;pfal_chr5;PFE0510c;Pf_625_625     | 1.0267158       | Up         | -2.069968       | Down       | -1.8241494     | Down       |
| Pfa3D7;chr8;PF08_0083;Pf_1741_1741       | 2.3719785       | Up         | -1.9893543      | Down       | 1.2319506      | Up         |
| Pfa3D7;chr12;PFL0895c;Pf_2869_2869       | 2.1433175       | Up         | -1.885732       | Down       | 1.1462016      | Up         |
| Pfa3D7;pfal_chr4;PFD0545w;Pf_4497_4497   | -1.3505797      | Down       | -1.6027428      | Down       | -2.2505116     | Down       |
| Pfa3D7;chr7;MAL7P1.22;Pf_4541_4541       | 3.221092        | Up         | -1.6859324      | Down       | 1.8862143      | Up         |
| Pfa3D7;chr13;PF13_0337;Pf_388_388        | -1.4069293      | Down       | 2.6926641       | Up         | 1.9074416      | Up         |
| Pfa3D7;pfal_chr9;PFI1410c;Pf_4426_4426   | -2.0966005      | Down       | 1.9709505       | Up         | -1.0810627     | Down       |
| Pfa3D7;chr12;PFL0065w;Pf_61_61           | 2.1335182       | Up         | -1.5712672      | Down       | 1.2849151      | Up         |
| Pfa3D7;chr10;PF10_0065;Pf_884_884        | -2.331653       | Down       | 1.6235957       | Up         | -1.4818165     | Down       |
| Pfa3D7;chr10;PF10_0101;Pf_208_208        | -1.2055795      | Down       | -2.3139017      | Down       | -2.5174336     | Down       |
| Pfa3D7;chr14;PF14_0412;Pf_2385_2385      | -2.4158878      | Down       | 2.3605886       | Up         | -1.097064      | Down       |
| Pfa3D7;chr13;PF13_0267;Pf_1493_1493      | -1.5632608      | Down       | -2.489122       | Down       | -3.9149334     | Down       |
| Pfa3D7;chr12;PFL1165w;Pf_2338_2338       | -1.5550948      | Down       | -1.9877125      | Down       | -2.7380922     | Down       |
| Pfa3D7;chr6;PFF1075w;Pf_2293_2293        | 1.1157179       | Up         | -2.4217286      | Down       | -2.4284573     | Down       |
| Pfa3D7;pfal_chr4;PFD0495c;Pf_2442_2442   | -1.1640774      | Down       | -1.7016495      | Down       | -2.0927522     | Down       |
| Pfa3D7;chr8;MAL8P1.52;Pf_296_296         | 2.3819745       | Up         | -1.9426471      | Down       | 1.3425071      | Up         |
| Pfa3D7;chr12;PFL1460c;Pf_672_672         | -1.0334198      | Down       | -2.336069       | Down       | -2.1685383     | Down       |
| Pfa3D7;chr11;PF11_0346;Pf_2052_2052      | 2.2077143       | Up         | -2.119319       | Down       | 1.0638466      | Up         |
| Pfa3D7;chr7;MAL7P1.152;Pf_2865_2865      | -2.0496278      | Down       | 2.3233387       | Up         | 1.2232989      | Up         |

| Accession number                       | [UT8] vs [UT16] |            | [UT16] vs [T16] |            | [UT8] vs [T16] |            |
|----------------------------------------|-----------------|------------|-----------------|------------|----------------|------------|
|                                        | Fold-change     | Regulation | Fold-change     | Regulation | Fold-change    | Regulation |
| Pfa3D7;chr8;MAL8P1.88;Pf_2214_2214     | 4.0434527       | Up         | -2.1902146      | Down       | 1.9188588      | Up         |
| Pfa3D7;pfal_chr5;PFE1500c;Pf_121_121   | 2.6888483       | Up         | 1.5649549       | Up         | 3.9936745      | Up         |
| Pfa3D7;pfal_chr5;PFE0640w;Pf_732_732   | -2.7461739      | Down       | 2.1019063       | Up         | -1.4756112     | Down       |
| Pfa3D7;pfal_chr1;PFA0210c;Pf_1240_1240 | -1.8484408      | Down       | 2.5631778       | Up         | 1.5581613      | Up         |
| Pfa3D7;chr14;PF14_0329;Pf_587_587      | -5.834456       | Down       | 6.6183753       | Up         | 1.1560472      | Up         |
| Pfa3D7;chr14;PF14_0257;Pf_463_463      | -1.541192       | Down       | 2.016385        | Up         | 1.274894       | Up         |
| Pfa3D7;chr13;PF13_0106;Pf_2315_2315    | 2.4223278       | Up         | -2.5743167      | Down       | -1.0386572     | Down       |
| Pfa3D7;chr14;PF14_0329;Pf_651_651      | -5.4694853      | Down       | 6.3797636       | Up         | 1.1888813      | Up         |
| Pfa3D7;chr13;PF13_0106;Pf_2275_2275    | 2.5431354       | Up         | -2.7191415      | Down       | -1.060926      | Down       |
| Pfa3D7;pfal_chr9;PFI0145w;Pf_385_385   | -2.9660938      | Down       | 1.5981934       | Up         | -1.7887747     | Down       |
| Pfa3D7;chr14;PF14_0266;Pf_1126_1126    | -2.2039232      | Down       | 1.6729596       | Up         | -1.3543468     | Down       |
| Pfa3D7;chr8;MAL8P1.63;Pf_938_938       | -4.318803       | Down       | 3.1286163       | Up         | -1.4531368     | Down       |
| Pfa3D7;chr11;PF11_0045;Pf_484_484      | -1.6848519      | Down       | -2.1416523      | Down       | -3.0562        | Down       |
| Pfa3D7;chr14;PF14_0272;Pf_346_346      | -1.3918395      | Down       | -1.7980437      | Down       | -2.2422674     | Down       |
| Pfa3D7;pfal_chr3;PFC0640w;Pf_6182_6182 | 2.0621324       | Up         | -5.179657       | Down       | -2.4514685     | Down       |
| Pfa3D7;pfal_chr3;PFC0640w;Pf_6282_6282 | 2.2346437       | Up         | -5.784975       | Down       | -2.5282433     | Down       |
| Pfa3D7;pfal_chr3;PFC0640w;Pf_6222_6222 | 2.0749512       | Up         | -5.444317       | Down       | -2.5575488     | Down       |
| Pfa3D7;chr11;PF11_0165;Pf_1133_1133    | -2.2298393      | Down       | 2.8162205       | Up         | 1.2385361      | Up         |
| Pfa3D7;chr11;PF11_0165;Pf_1383_1383    | -2.3214276      | Down       | 2.7440603       | Up         | 1.1382866      | Up         |
| Pfa3D7;chr11;PF11_0161;Pf_1376_1376    | -1.5826601      | Down       | 2.0758932       | Up         | 1.2373383      | Up         |
| Pfa3D7;chr11;PF11_0161;Pf_1133_1133    | -1.9509599      | Down       | 2.5976522       | Up         | 1.3036641      | Up         |
| Pfa3D7;pfal_chr2;PFB0935w;Pf_4232_4232 | -1.3256665      | Down       | 2.2827911       | Up         | 2.0030913      | Up         |
| Pfa3D7;chr12;PFL1185c;Pf_644_644       | -2.4051533      | Down       | 1.6649965       | Up         | -1.4938158     | Down       |
| Pfa3D7;chr14;PF14_0038;Pf_108_108      | -2.1184213      | Down       | 2.6415603       | Up         | 1.3175099      | Up         |
| Pfa3D7;pfal_chr5;PFE1215c;Pf_1005_1005 | 1.5514197       | Up         | -2.0115106      | Down       | -1.2922666     | Down       |
| Pfa3D7;chr13;PF13_0077;Pf_2421_2421    | -2.2454453      | Down       | 2.1370697       | Up         | -1.0881188     | Down       |
| Pfa3D7;chr8;PF08_0095;Pf_2003_2003     | -6.2010193      | Down       | 5.191631        | Up         | 1.0147704      | Up         |
| Pfa3D7;chr8;PF08_0095;Pf_1916_1916     | -5.3048973      | Down       | 4.812093        | Up         | -1.1040689     | Down       |
| Pfa3D7;chr13;MAL13P1.216;Pf_4272_4272  | 2.2720678       | Up         | -1.9615251      | Down       | 1.127466       | Up         |
| Pfa3D7;chr13;MAL13P1.216;Pf_4192_4192  | 2.4578948       | Up         | -1.9349966      | Down       | 1.1932123      | Up         |
| Pfa3D7;chr14;PF14_0051;Pf_4452_4452    | -2.0883358      | Down       | 2.4520335       | Up         | 1.1458536      | Up         |
| Pfa3D7;chr14;PF14_0316;Pf_4286_4286    | 2.334916        | Up         | -1.9957529      | Down       | 1.1462755      | Up         |
| Pfa3D7;chr11;PF11_0264;Pf_4344_4344    | -2.4961867      | Down       | 2.5939276       | Up         | -1.0169572     | Down       |
| Pfa3D7;chr11;PF11_0264;Pf_4141_4141    | -2.3433352      | Down       | 2.713921        | Up         | 1.1901748      | Up         |
| Pfa3D7;chr13;MAL13P1.162;Pf_610_610    | -1.967207       | Down       | 2.0135102       | Up         | 1.0324179      | Up         |
| Pfa3D7;pfal_chr2;PFB0085c;Pf_2591_2591 | 7.3279443       | Up         | -2.7194595      | Down       | 2.5237875      | Up         |
| Pfa3D7;chr11;PF11_0513;Pf_1703_1703    | 2.3335238       | Up         | -1.5327783      | Down       | 1.4170831      | Up         |
| Pfa3D7;chr12;PFL2550w;Pf_1353_1353     | 2.7382383       | Up         | -1.7997097      | Down       | 1.4819663      | Up         |
| Pfa3D7;chr12;PFL2550w;Pf_1313_1313     | 2.789557        | Up         | -1.6831471      | Down       | 1.6118995      | Up         |
| Pfa3D7;chr13;PF13_0336;Pf_2365_2365    | -2.109816       | Down       | 2.1797888       | Up         | -1.0404266     | Down       |
| Pfa3D7;chr13;PF13_0336;Pf_2405_2405    | -2.2674         | Down       | 2.124654        | Up         | -1.0266579     | Down       |
| Pfa3D7;chr12;PFL0960w;Pf_101_101       | -1.9725038      | Down       | 2.0677042       | Up         | 1.0620286      | Up         |
| Pfa3D7;chr12;PFL0960w;Pf_529_529       | -2.2174408      | Down       | 1.8889225       | Up         | -1.1169364     | Down       |
| Pfa3D7;chr7;MAL7P1.162;Pf_14839_14839  | 3.213346        | Up         | -1.7572929      | Down       | 1.637285       | Up         |
| Pfa3D7;chr7;MAL7P1.162;Pf_14703_14703  | 2.893372        | Up         | -1.6285889      | Down       | 1.6140785      | Up         |
| Pfa3D7;chr12;PFL0115w;Pf_16866_16866   | 2.4430606       | Up         | -2.6221876      | Down       | -1.2066195     | Down       |
| Pfa3D7;chr7;MAL7P1.162;Pf_14743_14743  | 3.5176308       | Up         | -1.7477363      | Down       | 1.6115867      | Up         |
| Pfa3D7;pfal_chr9;PFI1745c;Pf_446_446   | -4.362375       | Down       | 3.3389587       | Up         | -1.2716469     | Down       |
| Pfa3D7;chr10;PF10_0323;Pf_868_868      | -2.59599        | Down       | 1.4045733       | Up         | -1.855686      | Down       |
| Pfa3D7;chr12;PFL1945c;Pf_244_244       | 3.8784382       | Up         | -2.046163       | Down       | 2.1405642      | Up         |
| Pfa3D7;chr8;MAL8P1.6;Pf_447_447        | -1.2302786      | Down       | -1.7679882      | Down       | -2.013089      | Down       |
| Pfa3D7;pfal_chr3;PFC0305w;Pf_1467_1467 | -1.0760006      | Down       | -2.1150222      | Down       | -2.1728995     | Down       |
| Pfa3D7;pfal_chr3;PFC0305w;Pf_1334_1334 | -1.0675884      | Down       | -2.2932794      | Down       | -2.426778      | Down       |
| Pfa3D7;pfal_chr3;PFC0190c;Pf_1524_1524 | 1.456409        | Up         | -2.377899       | Down       | -1.6131833     | Down       |
| Pfa3D7;pfal_chr3;PFC0190c;Pf_1439_1439 | 1.3614023       | Up         | -2.1584685      | Down       | -1.5483562     | Down       |
| Pfa3D7;chr6;PFF0115c;Pf_2529_2529      | -2.6839106      | Down       | 3.2975821       | Up         | 1.1754402      | Up         |



| Accession number                         | [UT8] vs [UT16] |            | [UT16] vs [T16] |            | [UT8] vs [T16] |            |
|------------------------------------------|-----------------|------------|-----------------|------------|----------------|------------|
|                                          | Fold-change     | Regulation | Fold-change     | Regulation | Fold-change    | Regulation |
| Pfa3D7;chr6;PFF0115c;Pf_2696_2696        | -2.3485854      | Down       | 3.1221585       | Up         | 1.2122309      | Up         |
| Pfa3D7;chr6;PFF0715c;Pf_1099_1099        | -2.6013732      | Down       | 2.0277607       | Up         | -1.3484454     | Down       |
| Pfa3D7;chr6;PFF0715c;Pf_987_987          | -2.8300743      | Down       | 2.2365386       | Up         | -1.2692605     | Down       |
| Pfa3D7;chr13;MAL13P1.184;Pf_2795_2795    | -3.1687078      | Down       | 1.870337        | Up         | -1.8552924     | Down       |
| Pfa3D7;chr11;PF11_0098;Pf_293_293        | -1.8621873      | Down       | 2.4937134       | Up         | 1.2840852      | Up         |
| Pfa3D7;chr11;PF11_0098;Pf_914_914        | -1.7439514      | Down       | 2.1868882       | Up         | 1.2092475      | Up         |
| Pfa3D7;chr10;PF10_0155;Pf_1206_1206      | -1.1060162      | Down       | 3.0428264       | Up         | 2.7478118      | Up         |
| Pfa3D7;chr10;PF10_0155;Pf_955_955        | -1.1469488      | Down       | 3.1755643       | Up         | 2.7670572      | Up         |
| Pfa3D7;chr13;MAL13P1.60;Pf_3547_3547     | 2.369339        | Up         | 1.8364629       | Up         | 5.0063615      | Up         |
| Pfa3D7;chr13;MAL13P1.60;Pf_3200_3200     | 1.7954707       | Up         | 2.1727617       | Up         | 4.3819366      | Up         |
| Pfa3D7;pfal_chr4;PFD1155w;Pf_3459_3459   | 1.4645423       | Up         | 2.2206564       | Up         | 3.6178446      | Up         |
| Pfa3D7;chr7;PFO7_0128;Pf_4252_4252       | 1.79797         | Up         | 1.607259        | Up         | 3.4613187      | Up         |
| Pfa3D7;pfal_chr1;PFA0125c;Pf_4438_4438   | 2.1486464       | Up         | 1.5651716       | Up         | 3.703746       | Up         |
| Pfa3D7;pfal_chr1;PFA0075w;Pf_933_933     | -1.1156304      | Down       | 2.2345183       | Up         | 1.804963       | Up         |
| Pfa3D7;pfal_chr1;PFA0075w;Pf_558_558     | -1.1563463      | Down       | 2.069975        | Up         | 1.7292386      | Up         |
| Pfa3D7;pfal_chr3;PFC0115c;Pf_3956_3956   | 1.8238199       | Up         | 1.6647773       | Up         | 2.8506098      | Up         |
| Pfa3D7;pfal_chr3;PFC0115c;Pf_4016_4016   | 1.6624634       | Up         | 1.4522094       | Up         | 2.290467       | Up         |
| Pfa3D7;pfal_chr5;PFE1640w;Pf_9222_9222   | -1.0644897      | Down       | 2.3340185       | Up         | 1.9341693      | Up         |
| Pfa3D7;chr6;PFF0020c;Pf_3541_3541        | 2.0108361       | Up         | -1.4828721      | Down       | 1.2834039      | Up         |
| Pfa3D7;pfal_chr2;PFB0010w;Pf_4994_4994   | 2.6815495       | Up         | -1.2718066      | Down       | 1.9183333      | Up         |
| Pfa3D7;pfal_chr4;PFD0005w;Pf_7534_7534   | 2.4144099       | Up         | -1.2927706      | Down       | 1.8630095      | Up         |
| Pfa3D7;pfal_chr4;PFD1245c;Pf_5871_5871   | 2.2163954       | Up         | -1.2010826      | Down       | 1.8247327      | Up         |
| Pfa3D7;pfal_chr4;PFD1045c;Pf_12533_12533 | -1.6222169      | Down       | 2.5457757       | Up         | 1.4489433      | Up         |
| Pfa3D7;pfal_chr4;PFD1045c;Pf_12699_12699 | -1.5734673      | Down       | 2.7440734       | Up         | 1.6366116      | Up         |
| Pfa3D7;chr14;PF14_0423;Pf_4588_4588      | 2.4873092       | Up         | -2.3021703      | Down       | 1.0233346      | Up         |
| Pfa3D7;chr11;PF11_0074;Pf_1818_1818      | -2.3109093      | Down       | 2.043737        | Up         | -1.1043706     | Down       |
| Pfa3D7;chr11;PF11_0074;Pf_2025_2025      | -2.0641205      | Down       | 1.9968199       | Up         | -1.0922766     | Down       |
| Pfa3D7;chr14;PF14_0530;Pf_5641_5641      | 2.4363816       | Up         | -1.6928264      | Down       | 1.270513       | Up         |
| Pfa3D7;chr7;PFO7_0085;Pf_1507_1507       | -2.083428       | Down       | 1.7569149       | Up         | -1.1373003     | Down       |
| Pfa3D7;chr12;PFL2275c;Pf_147_147         | -3.033827       | Down       | 3.6964948       | Up         | 1.2481804      | Up         |
| Pfa3D7;chr12;PFL2275c;Pf_284_284         | -2.87787        | Down       | 3.5413632       | Up         | 1.1962295      | Up         |
| Pfa3D7;pfal_chr4;PFD0420c;Pf_1587_1587   | 1.7181275       | Up         | -2.3347225      | Down       | -1.3304368     | Down       |
| Pfa3D7;pfal_chr4;PFD0420c;Pf_1734_1734   | 1.8070444       | Up         | -2.1932428      | Down       | -1.2448503     | Down       |
| Pfa3D7;chr11;PF11_0172;Pf_832_832        | -2.1782582      | Down       | 2.1455226       | Up         | 1.0729681      | Up         |
| Pfa3D7;chr11;PF11_0172;Pf_516_516        | -1.9150234      | Down       | 2.0712724       | Up         | 1.1148348      | Up         |
| Pfa3D7;chr10;PF10_0244;Pf_2667_2667      | 2.0625799       | Up         | -2.0396419      | Down       | 1.0040864      | Up         |
| Pfa3D7;chr10;PF10_0244;Pf_2627_2627      | 2.2859776       | Up         | -1.9261738      | Down       | 1.1332705      | Up         |
| Pfa3D7;chr14;PF14_0425;Pf_1213_1213      | -2.2568364      | Down       | 2.1968832       | Up         | 1.0366657      | Up         |
| Pfa3D7;pfal_chr9;PFI1720w;Pf_1377_1377   | 3.380774        | Up         | -2.2191548      | Down       | 1.5721244      | Up         |
| Pfa3D7;pfal_chr9;PFI1720w;Pf_1475_1475   | 3.5215569       | Up         | -2.6151934      | Down       | 1.3742577      | Up         |
| Pfa3D7;chr6;PFF0120w;Pf_1065_1065        | -2.0787024      | Down       | 2.413769        | Up         | 1.2486818      | Up         |
| Pfa3D7;chr6;PFF0120w;Pf_646_646          | -2.448662       | Down       | 2.9878502       | Up         | 1.2146144      | Up         |
| Pfa3D7;chr10;PF10_0245;Pf_2158_2158      | 2.0055416       | Up         | -1.7715167      | Down       | 1.1053897      | Up         |
| Pfa3D7;chr10;PF10_0245;Pf_2407_2407      | 2.1478782       | Up         | -1.7106487      | Down       | 1.2186126      | Up         |
| Pfa3D7;chr14;PF14_0341;Pf_1586_1586      | -2.2448442      | Down       | 1.3401817       | Up         | -1.632759      | Down       |
| Pfa3D7;chr14;PF14_0341;Pf_1468_1468      | -2.4840925      | Down       | 1.8388393       | Up         | -1.3140577     | Down       |
| Pfa3D7;chr8;PFO8_0132;Pf_4083_4083       | -4.011878       | Down       | 1.8460755       | Up         | -1.8876904     | Down       |
| Pfa3D7;chr8;PFO8_0132;Pf_3487_3487       | -4.954689       | Down       | 2.431755        | Up         | -1.973668      | Down       |
| Pfa3D7;pfal_chr1;PFA0620c;Pf_1509_1509   | -4.574273       | Down       | 3.3883135       | Up         | -1.2795551     | Down       |
| Pfa3D7;pfal_chr1;PFA0620c;Pf_1427_1427   | -4.791629       | Down       | 3.658231        | Up         | -1.0366222     | Down       |
| Pfa3D7;pfal_chr9;PFI1110w;Pf_891_891     | 2.096548        | Up         | -2.6994312      | Down       | -1.2891341     | Down       |
| Pfa3D7;pfal_chr9;PFI1110w;Pf_1075_1075   | 2.071345        | Up         | -2.7003255      | Down       | -1.3038867     | Down       |
| Pfa3D7;pfal_chr3;PFC0271c;Pf_219_219     | -1.8654232      | Down       | 2.8350813       | Up         | 1.5572535      | Up         |
| Pfa3D7;chr14;PF14_0192;Pf_1372_1372      | -2.0059118      | Down       | 1.812157        | Up         | -1.060608      | Down       |
| Pfa3D7;chr14;PF14_0187;Pf_485_485        | 1.2260382       | Up         | 1.9804765       | Up         | 2.2901328      | Up         |
| Pfa3D7;chr12;PFL0780w;Pf_803_803         | -2.316131       | Down       | 2.6371226       | Up         | 1.1834137      | Up         |

| Accession number                       | [UT8] vs [UT16] |            | [UT16] vs [T16] |            | [UT8] vs [T16] |            |
|----------------------------------------|-----------------|------------|-----------------|------------|----------------|------------|
|                                        | Fold-change     | Regulation | Fold-change     | Regulation | Fold-change    | Regulation |
| Pfa3D7;chr12;PFL0780w;Pf_588_588       | -2.3554862      | Down       | 3.0922844       | Up         | 1.2822382      | Up         |
| Pfa3D7;chr13;PF13_0345;Pf_1135_1135    | -2.3178017      | Down       | 1.6038543       | Up         | -1.3933269     | Down       |
| Pfa3D7;chr13;PF13_0345;Pf_1055_1055    | -2.8278756      | Down       | 1.574522        | Up         | -1.6575084     | Down       |
| Pfa3D7;pfal_chr9;PFI0775w;Pf_545_545   | -1.6627856      | Down       | -2.0027843      | Down       | -2.7991831     | Down       |
| Pfa3D7;pfal_chr9;PFI0775w;Pf_586_586   | -1.5756129      | Down       | -2.018266       | Down       | -2.8176231     | Down       |
| Pfa3D7;chr14;PF14_0010;Pf_124_124      | 2.2791908       | Up         | -3.0290282      | Down       | -1.3757657     | Down       |
| Pfa3D7;chr13;PF13_0010;Pf_282_282      | 2.2003994       | Up         | 3.4736898       | Up         | 7.1998897      | Up         |
| Pfa3D7;chr13;PF13_0010;Pf_356_356      | 1.5696815       | Up         | 3.1178296       | Up         | 5.0508933      | Up         |
| Pfa3D7;chr10;PF10_0159;Pf_2271_2271    | -1.5115083      | Down       | 2.1394846       | Up         | 1.4378117      | Up         |
| Pfa3D7;chr10;PF10_0159;Pf_1850_1850    | -1.5137604      | Down       | 2.222334        | Up         | 1.3365281      | Up         |
| Pfa3D7;chr13;MAL13P1.348;Pf_2336_2336  | 6.907977        | Up         | -2.1124341      | Down       | 3.5582504      | Up         |
| Pfa3D7;pfal_chr9;PFI0570w;Pf_3105_3105 | -2.9507275      | Down       | 2.146568        | Up         | -1.361481      | Down       |
| Pfa3D7;pfal_chr9;PFI0570w;Pf_3165_3165 | -2.7479703      | Down       | 2.093734        | Up         | -1.3939263     | Down       |
| Pfa3D7;chr13;MAL13P1.241;Pf_613_613    | 1.368465        | Up         | -2.322775       | Down       | -1.5698245     | Down       |
| Pfa3D7;chr13;MAL13P1.241;Pf_434_434    | 1.3634138       | Up         | -2.3343422      | Down       | -1.603777      | Down       |
| Pfa3D7;chr10;PF10_0325;Pf_760_760      | -1.6537926      | Down       | 2.3033001       | Up         | 1.3486557      | Up         |
| Pfa3D7;chr10;PF10_0325;Pf_804_804      | -1.6953782      | Down       | 2.2454681       | Up         | 1.272112       | Up         |
| Pfa3D7;chr12;PFL2415w;Pf_661_661       | -2.0118923      | Down       | 1.4886668       | Up         | -1.3387064     | Down       |
| Pfa3D7;chr12;PFL2415w;Pf_741_741       | -2.0236585      | Down       | 1.3459797       | Up         | -1.4390975     | Down       |
| Pfa3D7;pfal_chr1;PFA0660w;Pf_813_813   | 1.5588231       | Up         | -2.1570694      | Down       | -1.4653244     | Down       |
| Pfa3D7;chr10;PF10_0153;Pf_1598_1598    | -3.729636       | Down       | 4.2220283       | Up         | 1.1966863      | Up         |
| Pfa3D7;chr10;PF10_0153;Pf_1419_1419    | -4.158158       | Down       | 4.7660694       | Up         | 1.1594951      | Up         |
| Pfa3D7;chr11;PF11_0351;Pf_1440_1440    | -2.5509644      | Down       | 2.5206795       | Up         | -1.0335039     | Down       |
| Pfa3D7;chr11;PF11_0351;Pf_1875_1875    | -2.4017444      | Down       | 2.2514486       | Up         | -1.0389842     | Down       |
| Pfa3D7;chr14;PF14_0417;Pf_2062_2062    | -1.9336282      | Down       | 2.9316459       | Up         | 1.4506017      | Up         |
| Pfa3D7;chr11;PF11_0188;Pf_2729_2729    | -3.2134414      | Down       | 2.2826262       | Up         | -1.4638896     | Down       |
| Pfa3D7;chr11;PF11_0188;Pf_2302_2302    | -3.3492172      | Down       | 2.3005803       | Up         | -1.3868072     | Down       |
| Pfa3D7;chr14;PF14_0417;Pf_2311_2311    | -2.1377237      | Down       | 2.9748085       | Up         | 1.3790623      | Up         |
| Pfa3D7;chr14;PF14_0528;Pf_641_641      | 2.273212        | Up         | -1.3942965      | Down       | 1.613713       | Up         |
| Pfa3D7;pfal_chr9;PFI1645c;Pf_1863_1863 | -1.6287498      | Down       | 2.433012        | Up         | 1.3314984      | Up         |
| Pfa3D7;pfal_chr4;PFD0795w;Pf_3673_3673 | -2.0465078      | Down       | 2.2317996       | Up         | 1.1456561      | Up         |
| Pfa3D7;pfal_chr4;PFD0795w;Pf_3461_3461 | -2.095366       | Down       | 2.2098353       | Up         | 1.1167506      | Up         |
| Pfa3D7;chr13;PF13_0293;Pf_1452_1452    | 2.3117533       | Up         | -2.2591827      | Down       | 1.0167496      | Up         |
| Pfa3D7;pfal_chr3;PFC0730w;Pf_297_297   | -2.2577813      | Down       | 1.6334109       | Up         | -1.3087275     | Down       |
| Pfa3D7;pfal_chr3;PFC0730w;Pf_578_578   | -2.0575364      | Down       | 1.5362804       | Up         | -1.2891778     | Down       |
| Pfa3D7;chr12;PFL1920c;Pf_191_191       | -2.6116123      | Down       | 3.3026404       | Up         | 1.2236903      | Up         |
| Pfa3D7;chr12;PFL1920c;Pf_106_106       | -2.8986092      | Down       | 3.2770238       | Up         | 1.1357622      | Up         |
| Pfa3D7;chr10;PF10_0044;Pf_3402_3402    | -1.0047433      | Down       | -2.2157676      | Down       | -2.2877798     | Down       |
| Pfa3D7;pfal_chr1;PFA0360c;Pf_1103_1103 | -1.0568347      | Down       | -2.1277905      | Down       | -2.2364416     | Down       |
| Pfa3D7;pfal_chr1;PFA0360c;Pf_1023_1023 | -1.0271205      | Down       | -2.2283812      | Down       | -2.2873046     | Down       |
| Pfa3D7;chr10;PF10_0385;Pf_182_182      | -1.2000461      | Down       | 2.3001761       | Up         | 1.7549427      | Up         |
| Pfa3D7;chr10;PF10_0121;Pf_530_530      | -2.4681435      | Down       | 2.9453511       | Up         | 1.2420167      | Up         |
| Pfa3D7;chr10;PF10_0121;Pf_323_323      | -2.6203308      | Down       | 3.5355518       | Up         | 1.4313328      | Up         |
| Pfa3D7;chr12;PFL1140w;Pf_586_586       | -2.7420084      | Down       | 3.614216        | Up         | 1.4190435      | Up         |
| Pfa3D7;chr12;PFL1140w;Pf_721_721       | -2.4284217      | Down       | 3.1782482       | Up         | 1.3824651      | Up         |
| Pfa3D7;pfal_chr5;PFE0070w;Pf_5093_5093 | 3.3386922       | Up         | -2.3440464      | Down       | 1.268876       | Up         |
| Pfa3D7;pfal_chr5;PFE0070w;Pf_4919_4919 | 2.5233681       | Up         | -1.8148127      | Down       | 1.2766688      | Up         |
| Pfa3D7;pfal_chr5;PFE0070w;Pf_4445_4445 | 3.1866825       | Up         | -2.3111258      | Down       | 1.26157        | Up         |
| Pfa3D7;chr11;PF11_0044;Pf_4090_4090    | -2.170796       | Down       | 2.0218992       | Up         | -1.1192102     | Down       |
| Pfa3D7;chr11;PF11_0044;Pf_4140_4140    | -1.9836476      | Down       | 2.0969017       | Up         | -1.008889      | Down       |
| Pfa3D7;chr13;PF13_0242;Pf_1164_1164    | -2.0069263      | Down       | 1.8057792       | Up         | -1.1523931     | Down       |
| Pfa3D7;chr12;PFL1210w;Pf_4991_4991     | -2.5377922      | Down       | 2.269603        | Up         | -1.1426278     | Down       |
| Pfa3D7;chr13;PF13_0238;Pf_2109_2109    | 1.6573387       | Up         | -2.2351403      | Down       | -1.24716       | Down       |
| Pfa3D7;chr12;PFL0545w;Pf_5178_5178     | -1.5456474      | Down       | -1.9655374      | Down       | -2.789628      | Down       |
| Pfa3D7;pfal_chr9;PFI1470c;Pf_5051_5051 | -3.174177       | Down       | 3.348782        | Up         | 1.187265       | Up         |
| Pfa3D7;pfal_chr9;PFI1470c;Pf_5252_5252 | -1.788967       | Down       | 2.0469394       | Up         | 1.1704957      | Up         |

| Accession number                       | [UT8] vs [UT16] |            | [UT16] vs [T16] |            | [UT8] vs [T16] |            |
|----------------------------------------|-----------------|------------|-----------------|------------|----------------|------------|
|                                        | Fold-change     | Regulation | Fold-change     | Regulation | Fold-change    | Regulation |
| Pfa3D7;chr8;PFB08_0011;Pf_4292_4292    | -2.9346282      | Down       | 3.3114848       | Up         | 1.1493561      | Up         |
| Pfa3D7;chr8;PFB08_0011;Pf_4177_4177    | -3.2193735      | Down       | 3.6744487       | Up         | 1.0954319      | Up         |
| Pfa3D7;pfal_chr2;PFB0915w;Pf_4451_4451 | 3.1959255       | Up         | -1.8210655      | Down       | 1.7575203      | Up         |
| Pfa3D7;pfal_chr2;PFB0915w;Pf_4311_4311 | 2.5379899       | Up         | -1.9809078      | Down       | 1.2894931      | Up         |
| Pfa3D7;pfal_chr9;PFI0980w;Pf_1737_1737 | -3.1831224      | Down       | 1.9370401       | Up         | -1.6293901     | Down       |
| Pfa3D7;chr6;PFF0290w;Pf_647_647        | 3.3340068       | Up         | -1.8933997      | Down       | 1.9423981      | Up         |
| Pfa3D7;chr6;PFF0290w;Pf_727_727        | 3.416312        | Up         | -2.017248       | Down       | 1.8328837      | Up         |
| Pfa3D7;chr6;PFF0580w;Pf_410_410        | -2.6080365      | Down       | 1.2507668       | Up         | -1.9994663     | Down       |
| Pfa3D7;pfal_chr4;PFD0285c;Pf_7055_7055 | -2.68498        | Down       | 2.0482092       | Up         | -1.3802407     | Down       |
| Pfa3D7;chr14;PF14_0166;Pf_1882_1882    | -2.435866       | Down       | 1.6046386       | Up         | -1.4765134     | Down       |
| Pfa3D7;chr14;PF14_0017;Pf_1046_1046    | -4.259287       | Down       | -1.968134       | Down       | -8.365022      | Down       |
| Pfa3D7;pfal_chr9;PFI1775w;Pf_1070_1070 | 2.1164207       | Up         | -2.047437       | Down       | 1.036466       | Up         |
| Pfa3D7;chr12;PFL2530w;Pf_1235_1235     | 4.233776        | Up         | -3.2896192      | Down       | 1.2238855      | Up         |
| Pfa3D7;chr12;PFL2530w;Pf_1295_1295     | 4.9564056       | Up         | -3.37952        | Down       | 1.4176484      | Up         |
| Pfa3D7;chr14;PF14_0439;Pf_1462_1462    | -2.0985928      | Down       | 1.9171544       | Up         | -1.0727118     | Down       |
| Pfa3D7;pfal_chr9;PFI1570c;Pf_1587_1587 | -2.684471       | Down       | 2.6216226       | Up         | 1.0205669      | Up         |
| Pfa3D7;pfal_chr9;PFI1570c;Pf_1527_1527 | -2.638795       | Down       | 2.5879521       | Up         | 1.0252516      | Up         |
| Pfa3D7;chr12;PFL1420w;Pf_208_208       | 1.6400124       | Up         | 2.4726036       | Up         | 3.9502313      | Up         |
| Pfa3D7;chr14;PF14_0387;Pf_1556_1556    | -4.1731877      | Down       | 4.578139        | Up         | 1.1211553      | Up         |
| Pfa3D7;chr6;PFF0815w;Pf_1434_1434      | -3.2594771      | Down       | 1.5938632       | Up         | -1.9709706     | Down       |
| Pfa3D7;chr6;PFF0815w;Pf_1011_1011      | -3.5209892      | Down       | 1.6550932       | Up         | -1.9033242     | Down       |
| Pfa3D7;chr10;PF10_0139;Pf_2463_2463    | 1.1817696       | Up         | -2.0557406      | Down       | -1.5338317     | Down       |
| Pfa3D7;pfal_chr5;PFE0040c;Pf_4179_4179 | -6.7448196      | Down       | 4.3962507       | Up         | -1.6123685     | Down       |
| Pfa3D7;chr8;PFB08_0033;Pf_1372_1372    | 1.2885947       | Up         | -2.111792       | Down       | -1.6996337     | Down       |
| Pfa3D7;chr8;PFB08_0033;Pf_617_617      | 1.5590131       | Up         | -2.1714683      | Down       | -1.4966362     | Down       |
| Pfa3D7;chr11;PF11_0486;Pf_6027_6027    | -1.1444573      | Down       | 2.071097        | Up         | 1.664181       | Up         |
| Pfa3D7;pfal_chr9;PFI1475w;Pf_5057_5057 | 1.7368797       | Up         | 1.3359046       | Up         | 2.6031783      | Up         |
| Pfa3D7;pfal_chr9;PFI1475w;Pf_4979_4979 | 1.8507824       | Up         | 1.280495        | Up         | 2.6069367      | Up         |
| Pfa3D7;chr6;PFF0995c;Pf_843_843        | 2.2806127       | Up         | -1.4993047      | Down       | 1.6156334      | Up         |
| Pfa3D7;pfal_chr2;PFB0305c;Pf_330_330   | 1.7075002       | Up         | 1.6204253       | Up         | 3.6086395      | Up         |
| Pfa3D7;chr10;PF10_0346;Pf_926_926      | 1.6248573       | Up         | 2.0312784       | Up         | 3.8229024      | Up         |
| Pfa3D7;chr10;PF10_0346;Pf_1050_1050    | 1.9658417       | Up         | 1.7594466       | Up         | 4.005187       | Up         |
| Pfa3D7;pfal_chr1;PFA0135w;Pf_753_753   | 4.2746415       | Up         | -1.8320267      | Down       | 2.4414256      | Up         |
| Pfa3D7;pfal_chr9;PFI0700c;Pf_1952_1952 | 2.0400152       | Up         | -1.4620714      | Down       | 1.3152833      | Up         |
| Pfa3D7;chr11;PF11_0059;Pf_871_871      | -2.1742945      | Down       | 1.8904266       | Up         | -1.1357636     | Down       |
| Pfa3D7;chr11;PF11_0059;Pf_1194_1194    | -2.0021303      | Down       | 1.9275781       | Up         | -1.0142312     | Down       |
| Pfa3D7;pfal_chr9;PFI0815c;Pf_581_581   | 2.2953532       | Up         | -1.740292       | Down       | 1.2480799      | Up         |
| Pfa3D7;chr13;PF13_0016;Pf_401_401      | -3.011065       | Down       | 2.6941245       | Up         | -1.0976217     | Down       |
| Pfa3D7;chr7;MAL7P1.145;Pf_3662_3662    | 2.475019        | Up         | -1.363391       | Down       | 1.7208931      | Up         |
| Pfa3D7;chr12;PFL0415w;Pf_308_308       | -3.9488878      | Down       | 5.773306        | Up         | 1.5169097      | Up         |
| Pfa3D7;chr13;PF13_0359;Pf_1652_1652    | -1.8269167      | Down       | 2.0954602       | Up         | 1.1064929      | Up         |
| Pfa3D7;chr14;PF14_0328;Pf_386_386      | -4.060302       | Down       | 3.713285        | Up         | -1.029584      | Down       |
| Pfa3D7;chr12;PFL2065c;Pf_208_208       | -3.46846        | Down       | 2.2591891       | Up         | -1.4954112     | Down       |
| Pfa3D7;chr13;PF13_0358;Pf_108_108      | -2.6511471      | Down       | 2.4885461       | Up         | -1.0667714     | Down       |
| Pfa3D7;pfal_chr5;PFE0140c;Pf_159_159   | -2.1482377      | Down       | 1.6986786       | Up         | -1.1678681     | Down       |
| Pfa3D7;chr13;PF13_0300;Pf_292_292      | -2.5058818      | Down       | 2.6074305       | Up         | -1.0411448     | Down       |
| Pfa3D7;chr12;PFL0500w;Pf_936_936       | -2.0532875      | Down       | 2.16308         | Up         | -1.0267041     | Down       |
| Pfa3D7;pfal_chr2;PFB0645c;Pf_521_521   | -2.1126616      | Down       | 1.4901347       | Up         | -1.3179022     | Down       |
| Pfa3D7;chr13;MAL13P1.200;Pf_243_243    | -1.6714851      | Down       | 2.4677284       | Up         | 1.5179757      | Up         |
| Pfa3D7;chr7;MAL7P1.93;Pf_267_267       | -2.5428848      | Down       | 1.7360773       | Up         | -1.3935113     | Down       |
| Pfa3D7;pfal_chr2;PFB0465c;Pf_1184_1184 | -2.4266772      | Down       | 2.5830522       | Up         | 1.0783855      | Up         |
| Pfa3D7;pfal_chr2;PFB0465c;Pf_1301_1301 | -2.075149       | Down       | 2.3899643       | Up         | 1.1015898      | Up         |
| Pfa3D7;chr13;PF13_0138;Pf_449_449      | 2.2998688       | Up         | -1.8185545      | Down       | 1.2755212      | Up         |
| Pfa3D7;chr13;PF13_0138;Pf_348_348      | 2.0076053       | Up         | -1.8187157      | Down       | 1.1146982      | Up         |
| Pfa3D7;chr13;PF13_0193;Pf_792_792      | 2.3318777       | Up         | -1.3323479      | Down       | 1.7335961      | Up         |
| Pfa3D7;chr13;PF13_0196;Pf_509_509      | 1.2469194       | Up         | 1.4360006       | Up         | 2.0655704      | Up         |

| Accession number                       | [UT8] vs [UT16] |            | [UT16] vs [T16] |            | [UT8] vs [T16] |            |
|----------------------------------------|-----------------|------------|-----------------|------------|----------------|------------|
|                                        | Fold-change     | Regulation | Fold-change     | Regulation | Fold-change    | Regulation |
| Pfa3D7;chr13;PF13_0191;Pf_1320_1320    | -4.3304715      | Down       | 4.248985        | Up         | -1.0690558     | Down       |
| Pfa3D7;chr14;PF14_0455;Pf_2874_2874    | -4.0010147      | Down       | 4.3318553       | Up         | 1.0499617      | Up         |
| Pfa3D7;chr14;PF14_0455;Pf_2780_2780    | -3.170778       | Down       | 4.2589836       | Up         | 1.1904628      | Up         |
| Pfa3D7;chr6;PFF0350w;Pf_1343_1343      | 1.0724431       | Up         | -2.6524918      | Down       | -2.43189       | Down       |
| Pfa3D7;chr6;PFF0350w;Pf_1275_1275      | 1.1164124       | Up         | -2.7484376      | Down       | -2.5067782     | Down       |
| Pfa3D7;chr13;MAL13P1.148;Pf_6290_6290  | -3.876722       | Down       | 1.4590592       | Up         | -2.4872212     | Down       |
| Pfa3D7;chr13;MAL13P1.148;Pf_6245_6245  | -3.9817088      | Down       | 1.4842865       | Up         | -2.686139      | Down       |
| Pfa3D7;chr13;MAL13P1.148;Pf_6419_6419  | -3.8741357      | Down       | 1.4307317       | Up         | -2.7341955     | Down       |
| Pfa3D7;chr12;PFL1435c;Pf_5925_5925     | 2.0925016       | Up         | -1.6790187      | Down       | 1.2996938      | Up         |
| Pfa3D7;chr13;MAL13P1.255;Pf_1607_1607  | -2.0781894      | Down       | 1.7484595       | Up         | -1.203437      | Down       |
| Pfa3D7;chr14;PF14_0164;Pf_1345_1345    | 4.5073743       | Up         | -2.5420752      | Down       | 2.0120366      | Up         |
| Pfa3D7;chr14;PF14_0164;Pf_1198_1198    | 4.3859563       | Up         | -2.6233857      | Down       | 1.8717513      | Up         |
| Pfa3D7;chr6;PFF1410c;Pf_1913_1913      | 2.1038942       | Up         | -1.4090602      | Down       | 1.4651673      | Up         |
| Pfa3D7;chr6;PFF1410c;Pf_1873_1873      | 2.1223073       | Up         | -1.3506178      | Down       | 1.510888       | Up         |
| Pfa3D7;chr13;PF13_0158;Pf_691_691      | 2.062277        | Up         | -1.5659132      | Down       | 1.262949       | Up         |
| Pfa3D7;pfal_chr4;PFD0110w;Pf_8553_8553 | 2.5216913       | Up         | 1.7804286       | Up         | 5.273059       | Up         |
| Pfa3D7;chr8;MAL8P1.32;Pf_1368_1368     | -2.7198527      | Down       | 3.5369048       | Up         | 1.281342       | Up         |
| Pfa3D7;chr8;MAL8P1.32;Pf_1646_1646     | -2.7532587      | Down       | 3.2782366       | Up         | 1.1621319      | Up         |
| Pfa3D7;chr14;PF14_0662;Pf_1229_1229    | -3.9451745      | Down       | 1.8183213       | Up         | -2.2228746     | Down       |
| Pfa3D7;chr12;PFL1585c;Pf_1302_1302     | -3.867727       | Down       | 2.514934        | Up         | -1.4781426     | Down       |
| Pfa3D7;chr6;PFF0435w;Pf_1105_1105      | -5.806377       | Down       | 3.1709652       | Up         | -1.6294267     | Down       |
| Pfa3D7;chr6;PFF0435w;Pf_848_848        | -5.7716966      | Down       | 3.4072568       | Up         | -1.5683552     | Down       |
| Pfa3D7;pfal_chr5;PFE0630c;Pf_767_767   | -2.1245313      | Down       | 2.155274        | Up         | 1.0353087      | Up         |
| Pfa3D7;pfal_chr5;PFE0630c;Pf_675_675   | -2.0229194      | Down       | 2.1912372       | Up         | 1.1434407      | Up         |
| Pfa3D7;chr6;PFF1265w;Pf_1028_1028      | -2.1133695      | Down       | 1.6467478       | Up         | -1.2730407     | Down       |
| Pfa3D7;chr8;PF08_0031;Pf_855_855       | -2.4429276      | Down       | 2.5547714       | Up         | 1.0773838      | Up         |
| Pfa3D7;chr8;PF08_0031;Pf_397_397       | -2.1958513      | Down       | 2.068691        | Up         | -1.0184282     | Down       |
| Pfa3D7;chr11;PF11_0327;Pf_4453_4453    | -4.9204473      | Down       | 3.5190117       | Up         | -1.2058978     | Down       |
| Pfa3D7;chr11;PF11_0327;Pf_4666_4666    | -3.7631395      | Down       | 3.0444822       | Up         | -1.2177485     | Down       |
| Pfa3D7;pfal_chr9;PFI0385c;Pf_780_780   | -1.688456       | Down       | -1.4961414      | Down       | -2.5168774     | Down       |
| Pfa3D7;pfal_chr9;PFI0385c;Pf_920_920   | -1.2721361      | Down       | -1.7012541      | Down       | -2.1301525     | Down       |
| Pfa3D7;chr7;MAL7P1.114;Pf_468_468      | -2.0042086      | Down       | 2.7159472       | Up         | 1.3940545      | Up         |
| Pfa3D7;chr7;MAL7P1.114;Pf_548_548      | -1.8231763      | Down       | 2.6554916       | Up         | 1.3906224      | Up         |
| Pfa3D7;pfal_chr5;PFE0060w;Pf_518_518   | -5.3281054      | Down       | 2.0561848       | Up         | -2.4857922     | Down       |
| Pfa3D7;pfal_chr5;PFE0060w;Pf_814_814   | -5.7557535      | Down       | 2.0252545       | Up         | -2.4844356     | Down       |
| Pfa3D7;pfal_chr3;PFC0950c;Pf_3040_3040 | -2.232961       | Down       | 1.821259        | Up         | -1.2085155     | Down       |
| Pfa3D7;pfal_chr3;PFC0950c;Pf_3143_3143 | -2.2954097      | Down       | 1.7504041       | Up         | -1.3027165     | Down       |
| Pfa3D7;pfal_chr9;PFI0380c;Pf_201_201   | -2.6261756      | Down       | 2.1799781       | Up         | -1.1045243     | Down       |
| Pfa3D7;pfal_chr9;PFI0380c;Pf_665_665   | -2.458711       | Down       | 2.2906163       | Up         | -1.0638692     | Down       |
| Pfa3D7;pfal_chr4;PFD0430c;Pf_2308_2308 | -1.095171       | Down       | -3.1989157      | Down       | -3.2974033     | Down       |
| Pfa3D7;pfal_chr4;PFD0430c;Pf_2231_2231 | -1.0225754      | Down       | -3.6031296      | Down       | -3.7321703     | Down       |
| Pfa3D7;chr8;PF08_0050;Pf_1697_1697     | -1.2199521      | Down       | -1.9708215      | Down       | -2.3357413     | Down       |
| Pfa3D7;chr8;PF08_0052;Pf_1970_1970     | 1.7805324       | Up         | -2.1994262      | Down       | -1.2757422     | Down       |
| Pfa3D7;chr8;PF08_0052;Pf_1847_1847     | 1.5691911       | Up         | -2.1891856      | Down       | -1.4546167     | Down       |
| Pfa3D7;chr10;PF10_0025;Pf_1773_1773    | 4.8344526       | Up         | -1.480542       | Down       | 3.1795444      | Up         |
| Pfa3D7;chr10;PF10_0025;Pf_1693_1693    | 4.645553        | Up         | -1.4767908      | Down       | 3.0494657      | Up         |
| Pfa3D7;pfal_chr3;PFC1080c;Pf_611_611   | -1.6866461      | Down       | 2.5910015       | Up         | 1.5483301      | Up         |
| Pfa3D7;pfal_chr1;PFA0680c;Pf_415_415   | -12.172911      | Down       | 16.184881       | Up         | 1.771123       | Up         |
| Pfa3D7;pfal_chr2;PFB0985c;Pf_496_496   | -14.235644      | Down       | 17.96075        | Up         | 1.4098294      | Up         |
| Pfa3D7;chr7;MAL7P1.5;Pf_536_536        | -14.227176      | Down       | 15.705601       | Up         | 1.447013       | Up         |
| Pfa3D7;pfal_chr2;PFB0985c;Pf_536_536   | -14.156301      | Down       | 17.587616       | Up         | 1.596347       | Up         |
| Pfa3D7;chr11;PF11_0025;Pf_516_516      | -14.747547      | Down       | 20.582361       | Up         | 1.6910819      | Up         |
| Pfa3D7;chr7;MAL7P1.58;Pf_607_607       | -1.9902558      | Down       | 3.6861          | Up         | 2.139585       | Up         |
| Pfa3D7;pfal_chr3;PFC1080c;Pf_531_531   | -14.621341      | Down       | 18.965921       | Up         | 1.2556581      | Up         |
| Pfa3D7;chr6;PFF0060w;Pf_531_531        | -12.844174      | Down       | 10.033199       | Up         | -1.1665459     | Down       |
| Pfa3D7;chr7;MAL7P1.5;Pf_225_225        | -14.369769      | Down       | 15.330968       | Up         | 1.2063392      | Up         |

| Accession number                       | [UT8] vs [UT16] |            | [UT16] vs [T16] |            | [UT8] vs [T16] |            |
|----------------------------------------|-----------------|------------|-----------------|------------|----------------|------------|
|                                        | Fold-change     | Regulation | Fold-change     | Regulation | Fold-change    | Regulation |
| Pfa3D7;chr10;PF10_0390;Pf_387_387      | -11.082863      | Down       | 16.343023       | Up         | 1.5041364      | Up         |
| Pfa3D7;chr10;PF10_0390;Pf_307_307      | -4.445926       | Down       | 5.1851993       | Up         | 1.2318038      | Up         |
| Pfa3D7;pfal_chr1;PFA0680c;Pf_375_375   | -11.742825      | Down       | 16.41868        | Up         | 1.4356511      | Up         |
| Pfa3D7;pfal_chr1;PFA0065w;Pf_378_378   | -16.741892      | Down       | 16.271128       | Up         | 1.1283872      | Up         |
| Pfa3D7;chr6;PFF1525c;Pf_519_519        | -13.75505       | Down       | 23.788952       | Up         | 1.9603627      | Up         |
| Pfa3D7;chr6;PFF0060w;Pf_491_491        | -15.346157      | Down       | 11.841101       | Up         | -1.193001      | Down       |
| Pfa3D7;chr14;PF14_0036;Pf_768_768      | -2.2164028      | Down       | 2.1351469       | Up         | 1.0214821      | Up         |
| Pfa3D7;chr13;PF13_0234;Pf_1406_1406    | -3.198376       | Down       | 2.7947705       | Up         | -1.1232942     | Down       |
| Pfa3D7;chr13;PF13_0234;Pf_1573_1573    | -3.496845       | Down       | 2.8058496       | Up         | -1.2512175     | Down       |
| Pfa3D7;chr11;PF11_0208;Pf_275_275      | -1.2232155      | Down       | 2.0564742       | Up         | 1.6733954      | Up         |
| Pfa3D7;chr11;PF11_0208;Pf_429_429      | -1.2767444      | Down       | 2.179852        | Up         | 1.6852239      | Up         |
| Pfa3D7;chr14;PF14_0280;Pf_527_527      | -2.100241       | Down       | 3.4192016       | Up         | 1.5607582      | Up         |
| Pfa3D7;chr14;PF14_0076;Pf_993_993      | 2.642956        | Up         | -2.1001332      | Down       | 1.2083521      | Up         |
| Pfa3D7;chr14;PF14_0076;Pf_1121_1121    | 2.5060782       | Up         | -1.8126519      | Down       | 1.3491427      | Up         |
| Pfa3D7;pfal_chr1;PFA0635c;Pf_1085_1085 | 3.119798        | Up         | -1.6738799      | Down       | 1.7950197      | Up         |
| Pfa3D7;pfal_chr1;PFA0635c;Pf_1045_1045 | 3.0200553       | Up         | -1.6550243      | Down       | 1.7150286      | Up         |
| Pfa3D7;pfal_chr1;PFA0700c;Pf_146_146   | -19.528961      | Down       | 6.667987        | Up         | -2.8395112     | Down       |
| Pfa3D7;pfal_chr2;PFB0110w;Pf_595_595   | -3.0793016      | Down       | 5.4588065       | Up         | 1.7382826      | Up         |
| Pfa3D7;pfal_chr9;PFI1750c;Pf_493_493   | -7.437633       | Down       | 3.9933305       | Up         | -1.7457918     | Down       |
| Pfa3D7;chr11;PF11_0504;Pf_813_813      | 6.4077682       | Up         | -2.5528185      | Down       | 2.29016        | Up         |
| Pfa3D7;pfal_chr1;PFA0610c;Pf_467_467   | 3.1165645       | Up         | -1.4155864      | Down       | 2.1328273      | Up         |
| Pfa3D7;pfal_chr2;PFB0110w;Pf_506_506   | -3.0007675      | Down       | 5.597504        | Up         | 1.8202013      | Up         |
| Pfa3D7;chr11;PF11_0041;Pf_433_433      | 10.484813       | Up         | -1.7749676      | Down       | 5.774433       | Up         |
| Pfa3D7;pfal_chr9;PFI1750c;Pf_448_448   | -6.5403886      | Down       | 4.294951        | Up         | -1.4006205     | Down       |
| Pfa3D7;chr7;MAL7P1.6;Pf_606_606        | 4.831429        | Up         | -2.059099       | Down       | 2.3167846      | Up         |
| Pfa3D7;chr10;PF10_0013;Pf_442_442      | -12.01702       | Down       | 1.9517655       | Up         | -5.3965783     | Down       |
| Pfa3D7;chr7;MAL7P1.6;Pf_465_465        | 5.409175        | Up         | -1.9600607      | Down       | 2.6152167      | Up         |
| Pfa3D7;chr14;PF14_0753;Pf_593_593      | 4.5129123       | Up         | -2.049653       | Down       | 2.0845304      | Up         |
| Pfa3D7;chr14;PF14_0753;Pf_673_673      | 5.0494676       | Up         | -2.0336802      | Down       | 2.3384826      | Up         |
| Pfa3D7;chr14;PF14_0743;Pf_516_516      | -18.477362      | Down       | 6.870784        | Up         | -2.1226041     | Down       |
| Pfa3D7;pfal_chr4;PFD1205w;Pf_524_524   | 2.441628        | Up         | -2.2008326      | Down       | 1.0806454      | Up         |
| Pfa3D7;chr14;PF14_0743;Pf_435_435      | -16.033415      | Down       | 6.78397         | Up         | -1.7768573     | Down       |
| Pfa3D7;pfal_chr2;PFB0953w;Pf_418_418   | -5.8325295      | Down       | 3.4809098       | Up         | -1.7035755     | Down       |
| Pfa3D7;pfal_chr2;PFB0953w;Pf_458_458   | -5.770143       | Down       | 3.3962226       | Up         | -1.6120422     | Down       |
| Pfa3D7;pfal_chr4;PFD1205w;Pf_307_307   | 3.2355912       | Up         | -2.4126735      | Down       | 1.3059194      | Up         |
| Pfa3D7;chr10;PF10_0024;Pf_1245_1245    | 9.731666        | Up         | -2.1307514      | Down       | 4.7681956      | Up         |
| Pfa3D7;pfal_chr9;PFI0085c;Pf_466_466   | -4.3040543      | Down       | 6.7959857       | Up         | 1.8294202      | Up         |
| Pfa3D7;pfal_chr4;PFD1200c;Pf_504_504   | 2.8947558       | Up         | -1.5951806      | Down       | 1.900066       | Up         |
| Pfa3D7;chr14;PF14_0742;Pf_408_408      | -8.379513       | Down       | 5.786194        | Up         | -1.577944      | Down       |
| Pfa3D7;chr14;PF14_0742;Pf_451_451      | -13.151387      | Down       | 7.759161        | Up         | -1.2627734     | Down       |
| Pfa3D7;chr8;MAL8P1.161;Pf_563_563      | -5.7168074      | Down       | 2.8263109       | Up         | -1.7906607     | Down       |
| Pfa3D7;chr8;MAL8P1.160;Pf_462_462      | 9.714537        | Up         | -2.5875812      | Down       | 3.696914       | Up         |
| Pfa3D7;chr8;MAL8P1.161;Pf_503_503      | -4.970775       | Down       | 2.770459        | Up         | -1.6824257     | Down       |
| Pfa3D7;chr8;MAL8P1.160;Pf_80_80        | 10.756849       | Up         | -2.6552267      | Down       | 4.2037883      | Up         |
| Pfa3D7;pfal_chr1;PFA0670c;Pf_448_448   | 3.5089397       | Up         | -1.6207849      | Down       | 2.2298         | Up         |
| Pfa3D7;pfal_chr1;PFA0670c;Pf_488_488   | 3.8055284       | Up         | -1.9384575      | Down       | 1.9721947      | Up         |
| Pfa3D7;pfal_chr2;PFB0932w;Pf_653_653   | 2.8328364       | Up         | -2.057993       | Down       | 1.4239669      | Up         |
| Pfa3D7;pfal_chr2;PFB0932w;Pf_693_693   | 3.2944913       | Up         | -1.9529811      | Down       | 1.65885        | Up         |
| Pfa3D7;chr8;MAL8P1.163;Pf_668_668      | -1.3230604      | Down       | -1.8344754      | Down       | -2.278646      | Down       |
| Pfa3D7;pfal_chr4;PFD0090c;Pf_644_644   | -9.765196       | Down       | 4.604674        | Up         | -2.0381238     | Down       |
| Pfa3D7;chr13;MAL13P1.470;Pf_948_948    | -1.1379123      | Down       | -2.2227345      | Down       | -2.7602162     | Down       |
| Pfa3D7;pfal_chr4;PFD0090c;Pf_684_684   | -8.072611       | Down       | 4.7576704       | Up         | -1.5444572     | Down       |
| Pfa3D7;chr12;PFL2565w;Pf_340_340       | 2.4052715       | Up         | -1.3024622      | Down       | 1.8671572      | Up         |
| Pfa3D7;chr12;PFL2565w;Pf_292_292       | 2.538234        | Up         | -1.2785465      | Down       | 1.999503       | Up         |
| Pfa3D7;pfal_chr4;PFD1185w;Pf_617_617   | 2.1813838       | Up         | -1.2404678      | Down       | 1.6891365      | Up         |

| Accession number                       | [UT8] vs [UT16] |            | [UT16] vs [T16] |            | [UT8] vs [T16] |            |
|----------------------------------------|-----------------|------------|-----------------|------------|----------------|------------|
|                                        | Fold-change     | Regulation | Fold-change     | Regulation | Fold-change    | Regulation |
| Pfa3D7;chr6;PFF0085w;Pf_626_626        | -2.7358804      | Down       | 1.7423583       | Up         | -1.6947526     | Down       |
| Pfa3D7;chr13;MAL13P1.58;Pf_306_306     | -1.3610357      | Down       | -2.0420663      | Down       | -2.7970781     | Down       |
| Pfa3D7;pfal_chr4;PFD0080c;Pf_1522_1522 | -4.8862348      | Down       | 3.215397        | Up         | -1.5407302     | Down       |
| Pfa3D7;pfal_chr2;PFB0080c;Pf_1299_1299 | -2.1814597      | Down       | 1.4946382       | Up         | -1.460648      | Down       |
| Pfa3D7;pfal_chr5;PFE1600w;Pf_1261_1261 | -2.168702       | Down       | 1.6859891       | Up         | -1.2720453     | Down       |
| Pfa3D7;pfal_chr9;PFI1785w;Pf_846_846   | -4.29208        | Down       | 2.7016685       | Up         | -1.7864549     | Down       |
| Pfa3D7;chr14;PF14_0731;Pf_855_855      | -7.0361114      | Down       | 2.6133022       | Up         | -2.5398655     | Down       |
| Pfa3D7;chr6;PFF0075c;Pf_518_518        | -1.7773234      | Down       | 2.1330051       | Up         | 1.0917058      | Up         |
| Pfa3D7;pfal_chr2;PFB0080c;Pf_828_828   | -2.2935495      | Down       | 1.6367139       | Up         | -1.4476416     | Down       |
| Pfa3D7;pfal_chr5;PFE1605w;Pf_964_964   | -5.3554654      | Down       | 2.481924        | Up         | -2.0800295     | Down       |
| Pfa3D7;chr12;PFL0050c;Pf_1776_1776     | -12.3981        | Down       | 11.368954       | Up         | -1.005499      | Down       |
| Pfa3D7;chr7;MAL7P1.7;Pf_1685_1685      | 5.5064926       | Up         | -2.4892573      | Down       | 2.1504314      | Up         |
| Pfa3D7;pfal_chr9;PFI0130c;Pf_971_971   | -3.363166       | Down       | 3.7384942       | Up         | 1.1448344      | Up         |
| Pfa3D7;chr7;MAL7P1.7;Pf_1483_1483      | 6.1524944       | Up         | -2.6940439      | Down       | 2.2373412      | Up         |
| Pfa3D7;pfal_chr5;PFE1605w;Pf_1103_1103 | -5.4951067      | Down       | 2.4667523       | Up         | -2.251261      | Down       |
| Pfa3D7;pfal_chr9;PFI0130c;Pf_916_916   | -1.468465       | Down       | 2.0313892       | Up         | 1.3944753      | Up         |
| Pfa3D7;pfal_chr4;PFD0095c;Pf_1608_1608 | 2.0294538       | Up         | -1.3281013      | Down       | 1.4322768      | Up         |
| Pfa3D7;chr14;PF14_0731;Pf_774_774      | -7.4003673      | Down       | 2.5689197       | Up         | -2.669752      | Down       |
| Pfa3D7;pfal_chr4;PFD0080c;Pf_1422_1422 | -5.63188        | Down       | 3.123916        | Up         | -1.7883849     | Down       |
| Pfa3D7;chr14;PF14_0746;Pf_1295_1295    | -2.8210497      | Down       | 1.4256351       | Up         | -2.0661604     | Down       |
| Pfa3D7;pfal_chr4;PFD1170c;Pf_597_597   | 2.057674        | Up         | -1.3426508      | Down       | 1.6134546      | Up         |
| Pfa3D7;chr6;PFF1510w;Pf_554_554        | -1.7261778      | Down       | 2.3750174       | Up         | 1.2346528      | Up         |
| Pfa3D7;chr12;PFL0050c;Pf_1876_1876     | -12.921554      | Down       | 10.256395       | Up         | -1.1335324     | Down       |
| Pfa3D7;pfal_chr2;PFB0105c;Pf_653_653   | 6.385202        | Up         | -2.7109177      | Down       | 2.3682828      | Up         |
| Pfa3D7;chr8;MAL8P1.4;Pf_1281_1281      | 3.0231526       | Up         | -1.7348796      | Down       | 1.6919069      | Up         |
| Pfa3D7;chr8;MAL8P1.4;Pf_1160_1160      | 3.5550175       | Up         | -1.7903395      | Down       | 1.7643588      | Up         |
| Pfa3D7;pfal_chr4;PFD1140w;Pf_678_678   | -14.361793      | Down       | 9.397167        | Up         | -1.3178575     | Down       |
| Pfa3D7;chr10;PF10_0163;Pf_823_823      | 7.158105        | Up         | -1.9911414      | Down       | 2.8014169      | Up         |
| Pfa3D7;chr7;MAL7P1.172;Pf_2606_2606    | 2.2989807       | Up         | -1.7884779      | Down       | 1.2829         | Up         |
| Pfa3D7;chr10;PF10_0021;Pf_625_625      | 2.3914838       | Up         | -2.2293043      | Down       | 1.0616517      | Up         |
| Pfa3D7;chr7;MAL7P1.172;Pf_2504_2504    | 2.217823        | Up         | -1.9119121      | Down       | 1.1601238      | Up         |
| Pfa3D7;chr10;PF10_0163;Pf_723_723      | 5.0231357       | Up         | -2.0496848      | Down       | 2.3391232      | Up         |
| Pfa3D7;pfal_chr4;PFD1140w;Pf_816_816   | -13.87778       | Down       | 7.7067475       | Up         | -1.6392642     | Down       |
| Pfa3D7;pfal_chr2;PFB0105c;Pf_778_778   | 5.9514804       | Up         | -2.5926416      | Down       | 2.3320415      | Up         |
| Pfa3D7;pfal_chr2;PFB0900c;Pf_674_674   | 8.32104         | Up         | -2.353114       | Down       | 3.110402       | Up         |
| Pfa3D7;chr10;PF10_0022;Pf_301_301      | 5.384609        | Up         | -2.7640636      | Down       | 2.029007       | Up         |
| Pfa3D7;chr10;PF10_0162;Pf_2326_2326    | 2.1793416       | Up         | -1.429345       | Down       | 1.4532726      | Up         |
| Pfa3D7;chr8;PF08_0001;Pf_399_399       | -10.29007       | Down       | 1.8342011       | Up         | -5.189215      | Down       |
| Pfa3D7;chr7;PF07_0107;Pf_2324_2324     | 3.9584477       | Up         | -1.7132331      | Down       | 2.2206244      | Up         |
| Pfa3D7;chr11;PF11_0511;Pf_500_500      | -11.523944      | Down       | 5.4561467       | Up         | -1.7327704     | Down       |
| Pfa3D7;pfal_chr3;PFC0090w;Pf_708_708   | 7.5489163       | Up         | -1.9580027      | Down       | 3.8958936      | Up         |
| Pfa3D7;pfal_chr2;PFB0910w;Pf_597_597   | 2.4714823       | Up         | -1.7718282      | Down       | 1.3098428      | Up         |
| Pfa3D7;chr10;PF10_0375;Pf_1060_1060    | -2.4583144      | Down       | 1.9690932       | Up         | -1.1554798     | Down       |
| Pfa3D7;chr13;MAL13P1.465;Pf_284_284    | -5.731646       | Down       | 5.480512        | Up         | -1.109035      | Down       |
| Pfa3D7;pfal_chr5;PFE1615c;Pf_377_377   | -13.223868      | Down       | 9.428351        | Up         | -1.1663752     | Down       |
| Pfa3D7;chr11;PF11_0508;Pf_768_768      | -2.7459157      | Down       | 2.4803853       | Up         | -1.033287      | Down       |
| Pfa3D7;pfal_chr1;PFA0630c;Pf_1339_1339 | -4.582593       | Down       | 3.749702        | Up         | -1.2042104     | Down       |
| Pfa3D7;chr7;PF07_0004;Pf_2236_2236     | 3.838431        | Up         | -2.4564934      | Down       | 1.6005038      | Up         |
| Pfa3D7;pfal_chr2;PFB0106c;Pf_663_663   | 3.8329258       | Up         | -2.1253107      | Down       | 1.7700922      | Up         |
| Pfa3D7;chr12;PFL2545c;Pf_21_21         | 8.192614        | Up         | -1.9778045      | Down       | 4.171328       | Up         |
| Pfa3D7;chr10;PF10_0376;Pf_1454_1454    | -3.0622528      | Down       | 2.9513013       | Up         | -1.1566837     | Down       |
| Pfa3D7;chr11;PF11_0508;Pf_1075_1075    | -2.8213005      | Down       | 2.7966344       | Up         | 1.1513498      | Up         |
| Pfa3D7;chr14;PF14_0744;Pf_449_449      | -3.3754396      | Down       | 2.8985603       | Up         | -1.1447259     | Down       |
| Pfa3D7;pfal_chr2;PFB0106c;Pf_725_725   | 3.9601994       | Up         | -1.9562894      | Down       | 1.9563502      | Up         |
| Pfa3D7;pfal_chr9;PFI1795c;Pf_681_681   | 1.0734723       | Up         | 2.619901        | Up         | 2.866913       | Up         |
| Pfa3D7;pfal_chr1;PFA0630c;Pf_1458_1458 | -4.557683       | Down       | 3.5666807       | Up         | -1.3110712     | Down       |

| Accession number                      | [UT8] vs [UT16] |            | [UT16] vs [T16] |            | [UT8] vs [T16] |            |
|---------------------------------------|-----------------|------------|-----------------|------------|----------------|------------|
|                                       | Fold-change     | Regulation | Fold-change     | Regulation | Fold-change    | Regulation |
| Pfa3D7;chr14;PF14_0736;Pf_2555_2555   | -1.3149757      | Down       | 2.282948        | Up         | 1.5854093      | Up         |
| Pfa3D7;pfal_chr3;PFC0090w;Pf_668_668  | 8.42267         | Up         | -1.9247242      | Down       | 4.2875767      | Up         |
| Pfa3D7;chr8;PF08_0001;Pf_479_479      | -9.737394       | Down       | 1.8253688       | Up         | -4.7764935     | Down       |
| Pfa3D7;chr14;PF14_0014;Pf_734_734     | -8.508517       | Down       | 12.137223       | Up         | 1.3940241      | Up         |
| Pfa3D7;pfal_chr5;PFE0050w;Pf_635_635  | -2.267577       | Down       | 1.8383789       | Up         | -1.2518946     | Down       |
| Pfa3D7;chr14;PF14_0014;Pf_673_673     | -4.109481       | Down       | 9.5568495       | Up         | 2.0378098      | Up         |
| Pfa3D7;pfal_chr2;PFB0910w;Pf_557_557  | 2.5065773       | Up         | -1.7768822      | Down       | 1.3078961      | Up         |
| Pfa3D7;chr7;PF07_0004;Pf_2826_2826    | 5.211747        | Up         | -2.760482       | Down       | 1.9026057      | Up         |
| Pfa3D7;chr7;MAL7P1.173;Pf_848_848     | 5.697322        | Up         | -2.6090024      | Down       | 1.8825495      | Up         |
| Pfa3D7;chr14;PF14_0744;Pf_321_321     | -3.1495187      | Down       | 2.7769747       | Up         | -1.3117546     | Down       |
| Pfa3D7;chr12;PFL0070c;Pf_3270_3270    | 1.7136033       | Up         | -2.9978857      | Down       | -1.7079077     | Down       |
| Pfa3D7;chr13;MAL13P1.62;Pf_115_115    | 1.0281209       | Up         | -2.1107218      | Down       | -1.9101074     | Down       |
| Pfa3D7;pfal_chr2;PFB0921c;Pf_291_291  | -2.2390137      | Down       | 2.1289802       | Up         | -1.020977      | Down       |
| Pfa3D7;pfal_chr2;PFB0921c;Pf_427_427  | -2.0168843      | Down       | 1.5127556       | Up         | -1.2527575     | Down       |
| Pfa3D7;pfal_chr5;PFE0050w;Pf_715_715  | -2.1565275      | Down       | 1.9589945       | Up         | -1.1480938     | Down       |
| Pfa3D7;chr7;PF07_0107;Pf_1932_1932    | 4.037921        | Up         | -1.5748223      | Down       | 2.4966946      | Up         |
| Pfa3D7;chr11;PF11_0014;Pf_532_532     | -11.779254      | Down       | 23.82255        | Up         | 2.028637       | Up         |
| Pfa3D7;chr11;PF11_0014;Pf_452_452     | -14.781583      | Down       | 24.622532       | Up         | 1.6763619      |            |
| Pfa3D7;chr14;PF14_0167;Pf_351_351     | -2.4564393      | Down       | 2.1897945       | Up         | -1.0611019     | Down       |
| Pfa3D7;pfal_chr4;PFD1135c;Pf_341_341  | 2.3691008       | Up         | -1.7354866      | Down       | 1.427211       | Up         |
| Pfa3D7;chr14;PF14_0708;Pf_6246_6246   | 1.7390051       | Up         | -3.736057       | Down       | -2.3759363     | Down       |
| Pfa3D7;chr13;PF13_0194;Pf_528_528     | 3.332227        | Up         | -1.955954       | Down       | 1.6094962      | Up         |
| Pfa3D7;chr14;PF14_0263;Pf_5426_5426   | 1.045192        | Up         | -2.1869154      | Down       | -2.0339787     | Down       |
| Pfa3D7;chr11;PF11_0505;Pf_56_56       | 2.1738598       | Up         | -1.3860486      | Down       | 1.5965413      | Up         |
| Pfa3D7;pfal_chr9;PFI0090c;Pf_977_977  | 2.7168112       | Up         | -1.6681049      | Down       | 1.5012215      | Up         |
| Pfa3D7;chr13;PF13_0194;Pf_481_481     | 3.8782394       | Up         | -1.832638       | Down       | 2.0153966      | Up         |
| Pfa3D7;chr10;PF10_0350;Pf_1705_1705   | -8.536722       | Down       | 4.369498        | Up         | -1.6627616     | Down       |
| Pfa3D7;chr10;PF10_0350;Pf_948_948     | -6.4853215      | Down       | 4.048899        | Up         | -1.4363441     | Down       |
| SSU_236-1662_1228_1228                | 2.7973826       | Up         | -2.2819302      | Down       | 1.349374       | Up         |
| Pfa3D7;chr12;PFL1965w;Pf_616_616      | -2.8421714      | Down       | 2.8767483       | Up         | 1.0126941      | Up         |
| LSU_2335-5116_2377_2377               | 2.5093346       | Up         | -2.5093255      | Down       | 1.0042742      | Up         |
| Pfa3D7;chr10;PF10_0144;Pf_745_745     | -4.1488457      | Down       | 3.4995437       | Up         | -1.0707809     | Down       |
| Pfa3D7;chr8;PF08_0006;Pf_306_306      | -3.4181998      | Down       | 2.8114352       | Up         | -1.1249486     | Down       |
| Pfa3D7;chr10;PF10_0144;Pf_644_644     | -4.0015273      | Down       | 3.50876         | Up         | 1.010981       | Up         |
| Pfa3D7;chr8;PF08_0006;Pf_627_627      | -3.235712       | Down       | 2.6261597       | Up         | -1.1658174     | Down       |
| Pfa3D7;pfal_chr3;PFC0745c;Pf_687_687  | -1.8020915      | Down       | 2.3864014       | Up         | 1.3596641      | Up         |
| Pfa3D7;chr13;MAL13P1.190;Pf_1444_1444 | -2.143223       | Down       | 1.6686764       | Up         | -1.3007025     | Down       |
| Pfa3D7;chr13;MAL13P1.190;Pf_1201_1201 | -2.0468576      | Down       | 1.5931171       | Up         | -1.2713996     | Down       |
| Pfa3D7;chr6;PFF0420c;Pf_375_375       | -1.5837079      | Down       | 2.074155        | Up         | 1.2860857      | Up         |
| Pfa3D7;pfal_chr5;PFE0915c;Pf_512_512  | -1.6273109      | Down       | 2.036897        | Up         | 1.2653822      | Up         |
| Pfa3D7;chr11;PF11_0286;Pf_1172_1172   | 1.4734807       | Up         | -2.1611001      | Down       | -1.689687      | Down       |
| Pfa3D7;chr8;PF08_0044;Pf_2173_2173    | 2.0579975       | Up         | -1.6217034      | Down       | 1.2382164      | Up         |
| Pfa3D7;chr8;PF08_0044;Pf_2233_2233    | 2.1079915       | Up         | -1.5765045      | Down       | 1.279243       | Up         |
| Pfa3D7;chr13;MAL13P1.185;Pf_833_833   | -4.126595       | Down       | 3.3529632       | Up         | -1.2056074     | Down       |
| Pfa3D7;chr13;MAL13P1.185;Pf_503_503   | -4.471524       | Down       | 4.0361457       | Up         | 1.0026437      | Up         |
| Pfa3D7;chr14;PF14_0264;Pf_6759_6759   | 4.5641456       | Up         | -3.2123468      | Down       | 1.371323       | Up         |
| Pfa3D7;chr14;PF14_0264;Pf_6819_6819   | 5.471887        | Up         | -3.162354       | Down       | 1.6185819      | Up         |
| Pfa3D7;pfal_chr5;PFE0795c;Pf_734_734  | -2.3001156      | Down       | 2.1104722       | Up         | -1.0429752     | Down       |
| Pfa3D7;chr10;PF10_0093;Pf_1272_1272   | -2.2298915      | Down       | 2.18862         | Up         | -1.0488069     | Down       |
| Pfa3D7;chr7;PF07_0110;Pf_1370_1370    | -2.2044966      | Down       | 1.7065662       | Up         | -1.376114      | Down       |
| Pfa3D7;pfal_chr5;PFE0795c;Pf_878_878  | -2.304825       | Down       | 1.9461181       | Up         | -1.0754445     | Down       |
| Pfa3D7;chr10;PF10_0124;Pf_4182_4182   | 2.419353        | Up         | -1.4833008      | Down       | 1.5377187      | Up         |
| Pfa3D7;chr10;PF10_0093;Pf_1141_1141   | -2.492689       | Down       | 2.169578        | Up         | -1.1772945     | Down       |
| Pfa3D7;pfal_chr5;PFE0660c;Pf_667_667  | 1.1181313       | Up         | 2.6342566       | Up         | 3.0269396      | Up         |
| Pfa3D7;pfal_chr5;PFE0660c;Pf_540_540  | 1.090057        | Up         | 2.5088723       | Up         | 2.813126       | Up         |

| Accession number                       | [UT8] vs [UT16] |            | [UT16] vs [T16] |            | [UT8] vs [T16] |            |
|----------------------------------------|-----------------|------------|-----------------|------------|----------------|------------|
|                                        | Fold-change     | Regulation | Fold-change     | Regulation | Fold-change    | Regulation |
| Pfa3D7;chr13;MAL13P1.284;Pf_723_723    | -3.419544       | Down       | 3.174273        | Up         | -1.0893168     | Down       |
| Pfa3D7;chr13;MAL13P1.284;Pf_494_494    | -3.032876       | Down       | 2.9307797       | Up         | 1.032873       | Up         |
| Pfa3D7;chr10;PF10_0363;Pf_1391_1391    | -3.1516364      | Down       | 3.2621412       | Up         | -1.0882354     | Down       |
| Pfa3D7;chr10;PF10_0363;Pf_1574_1574    | -3.6408064      | Down       | 3.3990989       | Up         | -1.169273      | Down       |
| Pfa3D7;pfal_chr2;PFB0500c;Pf_508_508   | -1.8681011      | Down       | 2.0175374       | Up         | 1.0947587      | Up         |
| Pfa3D7;pfal_chr9;PFI0155c;Pf_401_401   | -2.9998982      | Down       | 3.620843        | Up         | 1.1583738      | Up         |
| Pfa3D7;chr12;PFL0955c;Pf_145_145       | 1.1559472       | Up         | -2.3955426      | Down       | -1.9336014     | Down       |
| Pfa3D7;chr12;PFL0955c;Pf_225_225       | 1.2143227       | Up         | -2.2900424      | Down       | -1.9030513     | Down       |
| Pfa3D7;pfal_chr5;PFE1295c;Pf_2359_2359 | -3.4225738      | Down       | 2.3683147       | Up         | -1.5628374     | Down       |
| Pfa3D7;pfal_chr5;PFE0800w;Pf_3084_3084 | -2.6031313      | Down       | 2.3892555       | Up         | -1.1313316     | Down       |
| Pfa3D7;pfal_chr5;PFE0800w;Pf_3124_3124 | -2.8399572      | Down       | 2.4013197       | Up         | -1.1277173     | Down       |
| Pfa3D7;pfal_chr5;PFE0905w;Pf_4004_4004 | -2.9518356      | Down       | 2.7964365       | Up         | -1.1018062     | Down       |
| Pfa3D7;pfal_chr5;PFE1295c;Pf_2279_2279 | -2.5773022      | Down       | 2.3438842       | Up         | -1.0459466     | Down       |
| Pfa3D7;chr7;MAL7P1.23;Pf_3414_3414     | -1.5665973      | Down       | 2.0912817       | Up         | 1.2901577      | Up         |
| Pfa3D7;pfal_chr5;PFE0905w;Pf_3938_3938 | -2.9139564      | Down       | 2.7509663       | Up         | -1.0884496     | Down       |
| Pfa3D7;chr7;MAL7P1.23;Pf_3474_3474     | -2.2758439      | Down       | 2.3989806       | Up         | 1.0520893      | Up         |
| Pfa3D7;chr10;PF10_0057;Pf_4568_4568    | -2.4223557      | Down       | 2.4572306       | Up         | 1.0078048      | Up         |
| Pfa3D7;chr10;PF10_0057;Pf_4448_4448    | -2.05557        | Down       | 1.8898593       | Up         | -1.1441993     | Down       |
| Pfa3D7;pfal_chr1;PFA0545c;Pf_3402_3402 | -2.0527635      | Down       | 2.0507321       | Up         | 1.1504886      | Up         |
| Pfa3D7;pfal_chr4;PFD0475c;Pf_3371_3371 | -2.6275418      | Down       | 2.3650987       | Up         | -1.1742272     | Down       |
| Pfa3D7;chr10;PF10_0378;Pf_2499_2499    | 2.2419875       | Up         | -1.4539278      | Down       | 1.4174424      | Up         |
| Pfa3D7;chr13;PF13_0198;Pf_9304_9304    | 1.9959669       | Up         | 1.4904946       | Up         | 3.451243       | Up         |
| Pfa3D7;chr13;PF13_0198;Pf_9162_9162    | 2.1702416       | Up         | 1.4848945       | Up         | 3.6009023      | Up         |
| Pfa3D7;chr13;MAL13P1.176;Pf_8782_8782  | 2.1452272       | Up         | 1.6220624       | Up         | 3.9825583      | Up         |
| Pfa3D7;chr13;MAL13P1.176;Pf_9179_9179  | 2.0013604       | Up         | 1.7119403       | Up         | 3.9941835      | Up         |
| Pfa3D7;chr13;MAL13P1.176;Pf_8877_8877  | 2.0948572       | Up         | 1.7362312       | Up         | 4.099695       | Up         |
| Pfa3D7;chr13;PF13_0241;Pf_1495_1495    | -2.254179       | Down       | 2.2022681       | Up         | -1.0579233     | Down       |
| Pfa3D7;chr10;PF10_0402;Pf_719_719      | -3.1513875      | Down       | 4.3122673       | Up         | 1.4934231      | Up         |
| Pfa3D7;chr14;PF14_0772;Pf_552_552      | -2.6490343      | Down       | 3.8646092       | Up         | 1.4528358      | Up         |
| Pfa3D7;chr6;PFF1555w;Pf_890_890        | -4.3974285      | Down       | 5.3483086       | Up         | 1.2215213      | Up         |
| Pfa3D7;chr6;PFF1555w;Pf_930_930        | -6.43931        | Down       | 7.4498806       | Up         | 1.0204152      | Up         |
| Pfa3D7;chr10;PF10_0403;Pf_848_848      | 1.1285112       | Up         | 3.26981         | Up         | 3.7442696      | Up         |
| Pfa3D7;chr13;MAL13P1.515;Pf_851_851    | -6.3150325      | Down       | 7.445009        | Up         | 1.0166062      | Up         |
| Pfa3D7;chr10;PF10_0006;Pf_810_810      | -4.621216       | Down       | 5.004864        | Up         | 1.0744042      | Up         |
| Pfa3D7;chr14;PF14_0006;Pf_469_469      | -5.669228       | Down       | 6.2233095       | Up         | 1.2369928      | Up         |
| Pfa3D7;chr11;PF11_0529;Pf_700_700      | -3.6328063      | Down       | 3.6260712       | Up         | 1.1270868      | Up         |
| Pfa3D7;pfal_chr2;PFB1035w;Pf_754_754   | -13.558687      | Down       | 25.357733       | Up         | 1.9446347      | Up         |
| Pfa3D7;chr11;PF11_0021;Pf_632_632      | -9.055094       | Down       | 16.27476        | Up         | 1.9820544      | Up         |
| Pfa3D7;chr8;PFO8_0104;Pf_532_532       | -7.784257       | Down       | 5.7991905       | Up         | -1.3569458     | Down       |
| Pfa3D7;pfal_chr4;PFD0060w;Pf_761_761   | -5.7659855      | Down       | 4.481329        | Up         | -1.1199347     | Down       |
| Pfa3D7;chr10;PF10_0398;Pf_680_680      | -7.38251        | Down       | 10.753578       | Up         | 1.6821753      | Up         |
| Pfa3D7;pfal_chr1;PFA0760w;Pf_704_704   | -3.758719       | Down       | 4.1440854       | Up         | 1.1292542      | Up         |
| Pfa3D7;pfal_chr2;PFB1050w;Pf_722_722   | -1.9888104      | Down       | 2.2239938       | Up         | 1.1122444      | Up         |
| Pfa3D7;pfal_chr9;PFI0075w;Pf_926_926   | -4.739805       | Down       | 7.3953633       | Up         | 1.4682221      | Up         |
| Pfa3D7;chr12;PFL2645c;Pf_539_539       | -4.089321       | Down       | 4.7961297       | Up         | 1.2292308      | Up         |
| Pfa3D7;chr13;MAL13P1.495;Pf_629_629    | -7.960636       | Down       | 6.330164        | Up         | -1.125597      | Down       |
| Pfa3D7;chr12;PFL2645c;Pf_737_737       | -4.385279       | Down       | 6.3489823       | Up         | 1.3220865      | Up         |
| Pfa3D7;pfal_chr3;PFC0010c;Pf_529_529   | -4.1370587      | Down       | 4.291068        | Up         | 1.1068542      | Up         |
| Pfa3D7;chr7;PFO7_0132;Pf_824_824       | -8.002911       | Down       | 14.885843       | Up         | 2.068332       | Up         |
| Pfa3D7;chr14;PF14_0769;Pf_801_801      | -3.212447       | Down       | 6.0739875       | Up         | 1.9131521      | Up         |
| Pfa3D7;pfal_chr9;PFI0070w;Pf_732_732   | -4.156341       | Down       | 5.308419        | Up         | 1.4617572      | Up         |
| Pfa3D7;pfal_chr4;PFD0040c;Pf_682_682   | -4.683546       | Down       | 7.4308267       | Up         | 1.5191332      | Up         |
| Pfa3D7;pfal_chr1;PFA0020w;Pf_886_886   | -4.3049874      | Down       | 4.80571         | Up         | 1.1426879      | Up         |
| Pfa3D7;chr10;PF10_0006;Pf_460_460      | -5.00775        | Down       | 5.0125933       | Up         | 1.0818236      | Up         |
| Pfa3D7;chr11;PF11_0010;Pf_526_526      | -4.7730026      | Down       | 8.302673        | Up         | 1.7659532      | Up         |
| Pfa3D7;pfal_chr2;PFB1035w;Pf_435_435   | -5.6803527      | Down       | 6.2299547       | Up         | 1.1564608      | Up         |



| Accession number                     | [UT8] vs [UT16] |            | [UT16] vs [T16] |            | [UT8] vs [T16] |            |
|--------------------------------------|-----------------|------------|-----------------|------------|----------------|------------|
|                                      | Fold-change     | Regulation | Fold-change     | Regulation | Fold-change    | Regulation |
| Pfa3D7;chr14;PF14_0006;Pf_679_679    | -8.041793       | Down       | 8.240611        | Up         | -1.1545343     | Down       |
| Pfa3D7;chr13;MAL13P1.515;Pf_782_782  | -3.8305485      | Down       | 6.302259        | Up         | 1.3637283      | Up         |
| Pfa3D7;pfal_chr4;PFD0040c;Pf_762_762 | -2.538831       | Down       | 7.2192564       | Up         | 2.3873074      | Up         |
| Pfa3D7;chr14;PF14_0002;Pf_762_762    | -4.155622       | Down       | 4.6709647       | Up         | 1.0910562      | Up         |
| Pfa3D7;chr6;PFF1575w;Pf_934_934      | -4.3867745      | Down       | 4.10894         | Up         | -1.1858706     | Down       |
| Pfa3D7;chr11;PF11_0529;Pf_531_531    | -4.6434484      | Down       | 4.222048        | Up         | 1.0508763      | Up         |
| Pfa3D7;pfal_chr4;PFD0055w;Pf_883_883 | -14.1592455     | Down       | 15.565309       | Up         | 1.3161201      | Up         |
| Pfa3D7;chr12;PFL2615w;Pf_801_801     | -5.1068406      | Down       | 6.8752136       | Up         | 1.6030923      | Up         |
| Pfa3D7;chr12;PFL2585c;Pf_882_882     | -3.5084867      | Down       | 4.1147          | Up         | 1.3246471      | Up         |
| Pfa3D7;chr14;PF14_0002;Pf_657_657    | -4.563509       | Down       | 5.3797154       | Up         | 1.0431743      | Up         |
| Pfa3D7;chr6;PFF0035c;Pf_678_678      | -3.7739615      | Down       | 3.3317773       | Up         | -1.2685941     | Down       |
| Pfa3D7;chr14;PF14_0770;Pf_83_83      | -6.0258374      | Down       | 5.773053        | Up         | -1.0148876     | Down       |
| Pfa3D7;chr10;PF10_0405;Pf_927_927    | -3.7016544      | Down       | 3.510996        | Up         | -1.0819823     | Down       |
| Pfa3D7;chr7;PF07_0134;Pf_896_896     | -3.0479102      | Down       | 5.407679        | Up         | 1.6571094      | Up         |
| Pfa3D7;chr7;PF07_0133;Pf_768_768     | -3.102441       | Down       | 3.7240632       | Up         | 1.2983562      | Up         |
| Pfa3D7;pfal_chr9;PFI0075w;Pf_839_839 | -6.263824       | Down       | 8.359712        | Up         | 1.1377883      | Up         |
| Pfa3D7;chr7;PF07_0135;Pf_499_499     | -3.4094892      | Down       | 4.6392035       | Up         | 1.44928        | Up         |
| Pfa3D7;pfal_chr9;PFI0020w;Pf_582_582 | -8.2368355      | Down       | 6.2291846       | Up         | -1.4622017     | Down       |
| Pfa3D7;chr10;PF10_0397;Pf_202_202    | -2.0039814      | Down       | 3.3587322       | Up         | 1.5973675      | Up         |
| Pfa3D7;pfal_chr4;PFD0055w;Pf_736_736 | -13.439356      | Down       | 27.238102       | Up         | 2.3637118      | Up         |
| Pfa3D7;chr14;PF14_0770;Pf_571_571    | -7.492197       | Down       | 7.639693        | Up         | -1.049223      | Down       |
| Pfa3D7;pfal_chr9;PFI0070w;Pf_853_853 | -9.312627       | Down       | 9.105055        | Up         | 1.0414033      | Up         |
| Pfa3D7;chr6;PFF0035c;Pf_360_360      | -3.8838959      | Down       | 3.283737        | Up         | -1.3549132     | Down       |
| Pfa3D7;pfal_chr3;PFC0040w;Pf_782_782 | -4.4414787      | Down       | 3.0046086       | Up         | -1.0824434     | Down       |
| Pfa3D7;chr11;PF11_0515;Pf_774_774    | -3.3118024      | Down       | 4.5214767       | Up         | 1.3660967      | Up         |
| Pfa3D7;pfal_chr9;PFI0065w;Pf_830_830 | -5.8716435      | Down       | 6.3255076       | Up         | -1.0687405     | Down       |
| Pfa3D7;chr7;PF07_0135;Pf_776_776     | -4.4902077      | Down       | 5.046313        | Up         | 1.0320339      | Up         |
| Pfa3D7;chr10;PF10_0396;Pf_831_831    | -2.0796838      | Down       | 7.1463146       | Up         | 3.5541472      | Up         |
| Pfa3D7;chr8;PFO8_0104;Pf_763_763     | -10.413141      | Down       | 7.7950745       | Up         | -1.1680151     | Down       |
| Pfa3D7;pfal_chr3;PFC0010c;Pf_777_777 | -5.150574       | Down       | 4.6296043       | Up         | -1.0978557     | Down       |
| Pfa3D7;chr10;PF10_0396;Pf_964_964    | -2.1123443      | Down       | 7.3080554       | Up         | 3.5127118      | Up         |
| Pfa3D7;chr14;PF14_0003;Pf_632_632    | -1.4916779      | Down       | 2.390091        | Up         | 1.4158113      | Up         |
| Pfa3D7;chr7;PF07_0132;Pf_743_743     | -9.438867       | Down       | 11.305987       | Up         | 1.0593544      | Up         |
| Pfa3D7;pfal_chr4;PFD0060w;Pf_469_469 | -2.5050752      | Down       | 3.480093        | Up         | 1.3780298      | Up         |
| Pfa3D7;pfal_chr9;PFI0055c;Pf_534_534 | -4.3969235      | Down       | 4.3462653       | Up         | 1.0972888      | Up         |
| Pfa3D7;chr14;PF14_0003;Pf_106_106    | -2.1624706      | Down       | 2.8701885       | Up         | 1.295533       | Up         |
| Pfa3D7;chr11;PF11_0515;Pf_734_734    | -3.5061195      | Down       | 4.5741115       | Up         | 1.1708788      | Up         |
| Pfa3D7;pfal_chr4;PFD0030c;Pf_821_821 | -2.918548       | Down       | 2.131531        | Up         | -1.0683634     | Down       |
| Pfa3D7;pfal_chr1;PFA0760w;Pf_855_855 | -2.8663354      | Down       | 3.1995428       | Up         | 1.1410131      | Up         |
| Pfa3D7;chr7;PF07_0134;Pf_956_956     | -2.8083768      | Down       | 4.385767        | Up         | 1.4025835      | Up         |
| Pfa3D7;chr14;PF14_0772;Pf_764_764    | -3.8020444      | Down       | 5.2914267       | Up         | 1.2516409      | Up         |
| Pfa3D7;pfal_chr4;PFD1240w;Pf_764_764 | -4.4437284      | Down       | 4.847006        | Up         | 1.1765921      | Up         |
| Pfa3D7;chr14;PF14_0005;Pf_764_764    | -2.9809413      | Down       | 3.0280752       | Up         | -1.0328984     | Down       |
| Pfa3D7;pfal_chr2;PFB1050w;Pf_622_622 | -2.0948825      | Down       | 2.1488364       | Up         | 1.1990427      | Up         |
| Pfa3D7;pfal_chr9;PFI0065w;Pf_952_952 | -5.0987697      | Down       | 4.918041        | Up         | 1.0308528      | Up         |
| Pfa3D7;chr13;MAL13P1.495;Pf_749_749  | -6.743451       | Down       | 5.944607        | Up         | -1.0294032     | Down       |
| Pfa3D7;pfal_chr4;PFD1020c;Pf_136_136 | -5.3168855      | Down       | 9.317782        | Up         | 1.7030703      | Up         |
| Pfa3D7;chr13;MAL13P1.2;Pf_785_785    | -1.8500974      | Down       | 2.1848693       | Up         | 1.1604522      | Up         |
| Pfa3D7;chr14;PF14_0769;Pf_599_599    | -3.3431964      | Down       | 6.082906        | Up         | 1.8065101      | Up         |
| Pfa3D7;pfal_chr1;PFA0045c;Pf_862_862 | -4.266775       | Down       | 4.513426        | Up         | 1.0104941      | Up         |
| Pfa3D7;chr10;PF10_0398;Pf_818_818    | -8.367955       | Down       | 15.077175       | Up         | 2.200182       | Up         |
| Pfa3D7;chr10;PF10_0405;Pf_877_877    | -3.4522743      | Down       | 4.2046175       | Up         | 1.3023064      | Up         |
| Pfa3D7;pfal_chr4;PFD1240w;Pf_625_625 | -4.994949       | Down       | 5.13337         | Up         | 1.0353045      | Up         |
| Pfa3D7;pfal_chr1;PFA0020w;Pf_718_718 | -4.451296       | Down       | 4.7283545       | Up         | -1.1644986     | Down       |
| Pfa3D7;chr10;PF10_0403;Pf_888_888    | 1.2946079       | Up         | 2.4035254       | Up         | 3.855637       | Up         |
| Pfa3D7;chr11;PF11_0021;Pf_781_781    | -12.068761      | Down       | 12.842937       | Up         | 1.2572918      | Up         |

| Accession number                       | [UT8] vs [UT16] |            | [UT16] vs [T16] |            | [UT8] vs [T16] |            |
|----------------------------------------|-----------------|------------|-----------------|------------|----------------|------------|
|                                        | Fold-change     | Regulation | Fold-change     | Regulation | Fold-change    | Regulation |
| Pfa3D7;pfal_chr2;PFB1015w;Pf_868_868   | -2.0839741      | Down       | 3.1629043       | Up         | 1.5663687      | Up         |
| Pfa3D7;pfal_chr1;PFA0030c;Pf_624_624   | -1.691824       | Down       | 2.3002875       | Up         | 1.3657492      | Up         |
| Pfa3D7;chr12;PFL2615w;Pf_848_848       | -2.7456536      | Down       | 4.674256        | Up         | 1.4940432      | Up         |
| Pfa3D7;pfal_chr4;PFD1020c;Pf_96_96     | -9.408181       | Down       | 6.4807878       | Up         | -1.3393394     | Down       |
| Pfa3D7;chr12;PFL2640c;Pf_788_788       | -4.4310703      | Down       | 5.4600134       | Up         | 1.3017423      | Up         |
| Pfa3D7;chr7;PF07_0138;Pf_807_807       | -4.2947173      | Down       | 5.129685        | Up         | 1.3369217      | Up         |
| Pfa3D7;chr7;PF07_0138;Pf_862_862       | -6.505157       | Down       | 5.2364364       | Up         | -1.125194      | Down       |
| Pfa3D7;pfal_chr3;PFC0040w;Pf_628_628   | -2.9313574      | Down       | 3.6823769       | Up         | 1.1128387      | Up         |
| Pfa3D7;chr12;PFL2640c;Pf_748_748       | -13.397569      | Down       | 16.048334       | Up         | 1.3943334      | Up         |
| Pfa3D7;pfal_chr1;PFA0045c;Pf_729_729   | -3.2651544      | Down       | 4.5850153       | Up         | 1.4429605      | Up         |
| Pfa3D7;chr11;PF11_0011;Pf_86_86        | -2.2709432      | Down       | 2.8783648       | Up         | 1.3542016      | Up         |
| Pfa3D7;pfal_chr4;PFD1225w;Pf_64_64     | -5.2140703      | Down       | 4.6890564       | Up         | -1.4279703     | Down       |
| Pfa3D7;chr6;PFF0040c;Pf_673_673        | -7.638709       | Down       | 8.442142        | Up         | 1.0492177      | Up         |
| Pfa3D7;pfal_chr4;PFD0120w;Pf_778_778   | -1.1152478      | Down       | -2.6842957      | Down       | -4.321766      | Down       |
| Pfa3D7;pfal_chr5;PFE1635w;Pf_831_831   | -1.9604808      | Down       | 3.9714944       | Up         | 2.022031       | Up         |
| Pfa3D7;pfal_chr4;PFD1225w;Pf_104_104   | -5.185873       | Down       | 6.9099455       | Up         | 1.2416732      | Up         |
| Pfa3D7;chr13;MAL13P1.8;Pf_693_693      | -4.331346       | Down       | 4.3782063       | Up         | 1.0320613      | Up         |
| Pfa3D7;pfal_chr5;PFE1635w;Pf_951_951   | -1.5850785      | Down       | 3.1591222       | Up         | 1.9290181      | Up         |
| Pfa3D7;pfal_chr4;PFD0765w;Pf_2569_2569 | 2.0157192       | Up         | -1.9803231      | Down       | 1.0555679      | Up         |
| Pfa3D7;pfal_chr9;PFI1755c;Pf_869_869   | 2.2528381       | Up         | -1.6191436      | Down       | 1.2861336      | Up         |
| Pfa3D7;chr11;PF11_0512;Pf_2345_2345    | 3.3351743       | Up         | -1.812522       | Down       | 1.7142093      | Up         |
| Pfa3D7;chr14;PF14_0096;Pf_1256_1256    | -2.524426       | Down       | 2.1981823       | Up         | -1.0783759     | Down       |
| Pfa3D7;chr14;PF14_0096;Pf_1296_1296    | -2.4547374      | Down       | 2.0442166       | Up         | -1.1395025     | Down       |
| Pfa3D7;chr10;PF10_0047;Pf_2541_2541    | -3.5190098      | Down       | 2.7478054       | Up         | -1.3632778     | Down       |
| Pfa3D7;chr6;PFF1425w;Pf_1461_1461      | -1.9524829      | Down       | 2.1220808       | Up         | 1.0247884      | Up         |
| Pfa3D7;chr6;PFF1425w;Pf_1833_1833      | -1.8412819      | Down       | 2.0650942       | Up         | 1.1332085      | Up         |
| Pfa3D7;pfal_chr4;PFD0775c;Pf_1629_1629 | -2.3113267      | Down       | 2.190174        | Up         | -1.0102129     | Down       |
| Pfa3D7;chr10;PF10_0047;Pf_2501_2501    | -3.3242738      | Down       | 2.6433148       | Up         | -1.2952927     | Down       |
| Pfa3D7;pfal_chr4;PFD0775c;Pf_1589_1589 | -2.281434       | Down       | 2.159493        | Up         | -1.0480471     | Down       |
| Pfa3D7;chr11;PF11_0058;Pf_615_615      | -2.5856175      | Down       | 1.7926904       | Up         | -1.3758533     | Down       |
| Pfa3D7;chr11;PF11_0058;Pf_574_574      | -2.3083715      | Down       | 1.8405365       | Up         | -1.2192428     | Down       |
| Pfa3D7;chr14;PF14_0151;Pf_865_865      | -3.911389       | Down       | 2.595744        | Up         | -1.4505253     | Down       |
| Pfa3D7;chr14;PF14_0151;Pf_824_824      | -3.7184272      | Down       | 2.7368345       | Up         | -1.3268518     | Down       |
| Pfa3D7;chr11;PF11_0320;Pf_383_383      | -2.2168112      | Down       | 2.0894551       | Up         | -1.0070713     | Down       |
| Pfa3D7;chr8;PF08_0100;Pf_1183_1183     | -1.2273576      | Down       | -2.0493126      | Down       | -2.2616284     | Down       |
| Pfa3D7;chr8;MAL8P1.41;Pf_563_563       | 1.3316814       | Up         | 1.6787685       | Up         | 2.158088       | Up         |
| Pfa3D7;chr12;PFL1775c;Pf_1440_1440     | -3.8075407      | Down       | 2.9114528       | Up         | -1.2394061     | Down       |
| Pfa3D7;chr13;PF13_0324;Pf_2769_2769    | 2.3224902       | Up         | -2.0360155      | Down       | 1.1170595      | Up         |
| Pfa3D7;chr14;PF14_0040;Pf_502_502      | 1.3004612       | Up         | -3.3723798      | Down       | -2.4117029     | Down       |
| Pfa3D7;chr14;PF14_0040;Pf_542_542      | 1.5164347       | Up         | -3.5737467      | Down       | -2.2817967     | Down       |
| Pfa3D7;pfal_chr9;PFI0505c;Pf_3370_3370 | -1.6192021      | Down       | 2.213           | Up         | 1.3184365      | Up         |
| Pfa3D7;pfal_chr9;PFI0505c;Pf_3514_3514 | -1.8884859      | Down       | 2.487249        | Up         | 1.3568404      | Up         |
| Pfa3D7;pfal_chr2;PFB0360c;Pf_2810_2810 | 1.6678938       | Up         | -2.0407705      | Down       | -1.1607244     | Down       |
| Pfa3D7;pfal_chr2;PFB0325c;Pf_1857_1857 | 1.7242345       | Up         | -10.95894       | Down       | -8.417901      | Down       |
| Pfa3D7;pfal_chr4;PFD1175w;Pf_3388_3388 | -1.1209186      | Down       | -1.7363344      | Down       | -2.036624      | Down       |
| Pfa3D7;chr12;PFL0040c;Pf_1498_1498     | 2.3860588       | Up         | -2.0920928      | Down       | 1.1281767      | Up         |
| Pfa3D7;pfal_chr9;PFI0115c;Pf_1414_1414 | 2.2604222       | Up         | -1.8949379      | Down       | 1.0601721      | Up         |
| Pfa3D7;chr12;PFL0040c;Pf_1543_1543     | 2.558793        | Up         | -2.2264278      | Down       | 1.119438       | Up         |
| Pfa3D7;pfal_chr9;PFI0095c;Pf_1470_1470 | 2.5136273       | Up         | -1.45986        | Down       | 1.6064113      | Up         |
| Pfa3D7;chr11;PF11_0510;Pf_1568_1568    | 3.2427573       | Up         | -1.6699113      | Down       | 1.9846011      | Up         |
| Pfa3D7;pfal_chr9;PFI0120c;Pf_1682_1682 | 4.481132        | Up         | -2.061685       | Down       | 2.055258       | Up         |
| Pfa3D7;chr11;PF11_0510;Pf_1429_1429    | 3.2852337       | Up         | -1.6786206      | Down       | 1.9365202      | Up         |
| Pfa3D7;pfal_chr3;PFC0060c;Pf_1686_1686 | 7.5721736       | Up         | -2.9638202      | Down       | 2.3644474      | Up         |
| Pfa3D7;pfal_chr4;PFD1175w;Pf_3595_3595 | -1.175264       | Down       | -1.8696532      | Down       | -2.2913828     | Down       |
| Pfa3D7;pfal_chr3;PFC0060c;Pf_1536_1536 | 7.0810585       | Up         | -3.5128138      | Down       | 1.9693382      | Up         |
| Pfa3D7;pfal_chr9;PFI0100c;Pf_1448_1448 | 2.4993737       | Up         | -1.9685473      | Down       | 1.198888       | Up         |

| Accession number                       | [UT8] vs [UT16] |            | [UT16] vs [T16] |            | [UT8] vs [T16] |            |
|----------------------------------------|-----------------|------------|-----------------|------------|----------------|------------|
|                                        | Fold-change     | Regulation | Fold-change     | Regulation | Fold-change    | Regulation |
| Pfa3D7;chr14;PF14_0227;Pf_852_852      | -2.597834       | Down       | 1.3594087       | Up         | -1.8159928     | Down       |
| Pfa3D7;chr8;PF08_0129;Pf_1695_1695     | 1.2700531       | Up         | -2.0193372      | Down       | -1.463034      | Down       |
| Pfa3D7;chr11;PF11_0321;Pf_2007_2007    | -4.9628057      | Down       | 2.0653026       | Up         | -1.8526917     | Down       |
| Pfa3D7;chr11;PF11_0321;Pf_2163_2163    | -5.8281226      | Down       | 2.0001225       | Up         | -2.812568      | Down       |
| Pfa3D7;pfal_chr4;PFD0190w;Pf_3431_3431 | 1.9460539       | Up         | -2.1576195      | Down       | -1.1549175     | Down       |
| Pfa3D7;pfal_chr4;PFD0310w;Pf_153_153   | -1.2211138      | Down       | -1.85125        | Down       | -2.3915393     | Down       |
| Pfa3D7;chr12;PFL2245w;Pf_694_694       | -3.422214       | Down       | 2.4156506       | Up         | -1.3624465     | Down       |
| Pfa3D7;pfal_chr5;PFE0435c;Pf_794_794   | -3.7104027      | Down       | 3.113011        | Up         | -1.2687868     | Down       |
| Pfa3D7;chr8;MAL8P1.78;Pf_1_1           | -1.7246023      | Down       | -2.670083       | Down       | -3.5411582     | Down       |
| Pfa3D7;chr8;MAL8P1.78;Pf_262_262       | -1.6950119      | Down       | -2.4065447      | Down       | -3.6584044     | Down       |
| Pfa3D7;pfal_chr5;PFE0285c;Pf_238_238   | -1.6381838      | Down       | 2.1740818       | Up         | 1.3830495      | Up         |
| Pfa3D7;chr8;MAL8P1.21;Pf_640_640       | -3.0429952      | Down       | 2.3958676       | Up         | -1.2775055     | Down       |
| Pfa3D7;chr6;PFF1025c;Pf_785_785        | -2.0969098      | Down       | 1.7185557       | Up         | -1.1865449     | Down       |
| Pfa3D7;chr6;PFF1025c;Pf_667_667        | -2.22733        | Down       | 1.4502485       | Up         | -1.5116383     | Down       |
| Pfa3D7;chr13;MAL13P1.206;Pf_1984_1984  | 1.6275814       | Up         | -2.0879567      | Down       | -1.2773701     | Down       |
| Pfa3D7;chr14;PF14_0493;Pf_2150_2150    | -2.8829641      | Down       | 1.2370274       | Up         | -2.2141263     | Down       |
| Pfa3D7;pfal_chr3;PFC0165w;Pf_6867_6867 | -3.2763276      | Down       | 2.8551793       | Up         | -1.0744545     | Down       |
| Pfa3D7;chr11;PF11_0480;Pf_8461_8461    | 1.8063785       | Up         | -4.312257       | Down       | -2.5480268     | Down       |
| Pfa3D7;pfal_chr4;PFD0425w;Pf_2717_2717 | 1.4117054       | Up         | -2.3682816      | Down       | -1.6930009     | Down       |
| Pfa3D7;pfal_chr4;PFD0425w;Pf_2619_2619 | 1.353934        | Up         | -2.2549248      | Down       | -1.7121291     | Down       |
| Pfa3D7;chr13;PF13_0201;Pf_1650_1650    | -1.1525694      | Down       | -2.6691308      | Down       | -2.9927313     | Down       |
| Pfa3D7;chr13;PF13_0201;Pf_1364_1364    | -1.3239589      | Down       | -2.326111       | Down       | -2.972547      | Down       |
| Pfa3D7;pfal_chr4;PFD1035w;Pf_825_825   | -2.144371       | Down       | 2.2934198       | Up         | -1.0076038     | Down       |
| Pfa3D7;pfal_chr4;PFD1035w;Pf_904_904   | -2.0674994      | Down       | 2.2045813       | Up         | -1.0081872     | Down       |
| Pfa3D7;pfal_chr3;PFC0025c;Pf_699_699   | -2.4567604      | Down       | 2.66338         | Up         | 1.1679615      | Up         |
| Pfa3D7;chr14;PF14_0771;Pf_676_676      | -2.9961348      | Down       | 3.6613564       | Up         | 1.4896494      | Up         |
| Pfa3D7;chr13;MAL13P1.7;Pf_697_697      | -7.50286        | Down       | 10.504428       | Up         | 1.3702246      | Up         |
| Pfa3D7;pfal_chr4;PFD1220c;Pf_538_538   | -13.550726      | Down       | 23.112585       | Up         | 2.1218543      | Up         |
| Pfa3D7;pfal_chr1;PFA0750w;Pf_678_678   | -4.9754696      | Down       | 9.8282995       | Up         | 1.8578887      | Up         |
| Pfa3D7;chr6;PFF1550w;Pf_665_665        | -10.04054       | Down       | 18.997358       | Up         | 1.9490459      | Up         |
| Pfa3D7;chr13;MAL13P1.490;Pf_577_577    | -12.5089035     | Down       | 18.420258       | Up         | 1.5240763      | Up         |
| Pfa3D7;chr6;PFF0850c;Pf_692_692        | -9.031766       | Down       | 25.403711       | Up         | 3.0966306      | Up         |
| Pfa3D7;chr13;MAL13P1.490;Pf_537_537    | -13.572703      | Down       | 21.744726       | Up         | 1.7837807      | Up         |
| Pfa3D7;chr14;PF14_0007;Pf_692_692      | -5.3236704      | Down       | 7.466056        | Up         | 1.3180206      | Up         |
| Pfa3D7;chr10;PF10_0395;Pf_759_759      | -15.774636      | Down       | 62.8726         | Up         | 4.7900825      | Up         |
| Pfa3D7;chr13;MAL13P1.7;Pf_609_609      | -7.556169       | Down       | 11.527165       | Up         | 1.3239621      | Up         |
| Pfa3D7;pfal_chr4;PFD1220c;Pf_634_634   | -12.495864      | Down       | 22.335556       | Up         | 2.2654855      | Up         |
| Pfa3D7;chr12;PFL2610w;Pf_588_588       | -1.7109298      | Down       | 3.525811        | Up         | 1.9086733      | Up         |
| Pfa3D7;chr12;PFL2610w;Pf_648_648       | -1.675805       | Down       | 2.3537374       | Up         | 1.4647849      | Up         |
| Pfa3D7;chr10;PF10_0395;Pf_719_719      | -16.983034      | Down       | 49.57544        | Up         | 3.0020816      | Up         |
| Pfa3D7;chr6;PFF1550w;Pf_623_623        | -10.049598      | Down       | 14.385746       | Up         | 1.6836971      | Up         |
| Pfa3D7;chr6;PFF0850c;Pf_613_613        | -8.083183       | Down       | 15.967463       | Up         | 2.1505296      | Up         |
| Pfa3D7;chr14;PF14_0007;Pf_618_618      | -3.7965212      | Down       | 5.7805014       | Up         | 1.9196258      | Up         |
| Pfa3D7;chr12;PFL2635w;Pf_348_348       | -4.9598346      | Down       | 5.007126        | Up         | -1.1365215     | Down       |
| Pfa3D7;chr14;PF14_0767;Pf_587_587      | -7.8142085      | Down       | 12.007656       | Up         | 1.6173648      | Up         |
| Pfa3D7;chr14;PF14_0771;Pf_571_571      | -2.7229538      | Down       | 3.8072798       | Up         | 1.4593463      | Up         |
| Pfa3D7;chr11;PF11_0516;Pf_407_407      | -7.367809       | Down       | 7.5457945       | Up         | 1.110596       | Up         |
| Pfa3D7;pfal_chr1;PFA0750w;Pf_638_638   | -10.3709        | Down       | 14.274201       | Up         | 1.5711033      | Up         |
| Pfa3D7;chr13;MAL13P1.505;Pf_670_670    | -1.9981116      | Down       | 2.871446        | Up         | 1.4003931      | Up         |
| Pfa3D7;chr12;PFL2620w;Pf_375_375       | -3.7968915      | Down       | 3.9388452       | Up         | -1.0884243     | Down       |
| Pfa3D7;chr11;PF11_0516;Pf_570_570      | -7.1105967      | Down       | 11.537958       | Up         | 1.7333858      | Up         |
| Pfa3D7;pfal_chr4;PFD0035c;Pf_734_734   | -1.9003583      | Down       | 2.0672534       | Up         | 1.1462479      | Up         |
| Pfa3D7;chr14;PF14_0767;Pf_695_695      | -2.4729314      | Down       | 3.8231633       | Up         | 1.6964124      | Up         |
| Pfa3D7;pfal_chr9;PFI0045c;Pf_531_531   | -1.927499       | Down       | 2.5478752       | Up         | 1.4128741      | Up         |
| Pfa3D7;chr7;PF07_0130;Pf_598_598       | -2.1098912      | Down       | 1.8119774       | Up         | 1.0939581      | Up         |

| Accession number                       | [UT8] vs [UT16] |            | [UT16] vs [T16] |            | [UT8] vs [T16] |            |
|----------------------------------------|-----------------|------------|-----------------|------------|----------------|------------|
|                                        | Fold-change     | Regulation | Fold-change     | Regulation | Fold-change    | Regulation |
| Pfa3D7;chr7;PF07_0130;Pf_697_697       | -2.646605       | Down       | 2.7974045       | Up         | 1.1876702      | Up         |
| Pfa3D7;pfa1_chr3;PFC1105w;Pf_563_563   | -7.3235245      | Down       | 8.388672        | Up         | 1.2704353      | Up         |
| Pfa3D7;pfa1_chr3;PFC1105w;Pf_663_663   | -10.103441      | Down       | 13.376127       | Up         | 1.1400242      | Up         |
| Pfa3D7;pfa1_chr4;PFD0065w;Pf_896_896   | -2.1958652      | Down       | 2.801209        | Up         | 1.377489       | Up         |
| Pfa3D7;chr11;PF11_0013;Pf_524_524      | -4.398066       | Down       | 4.5395985       | Up         | -1.0289284     | Down       |
| Pfa3D7;pfa1_chr4;PFD0065w;Pf_711_711   | -1.7814031      | Down       | 2.854486        | Up         | 1.7107567      | Up         |
| Pfa3D7;chr11;PF11_0013;Pf_569_569      | -5.323786       | Down       | 5.6944823       | Up         | 1.0845532      | Up         |
| Pfa3D7;chr10;PF10_0009;Pf_573_573      | -4.4838195      | Down       | 8.72424         | Up         | 1.7665944      | Up         |
| Pfa3D7;chr10;PF10_0009;Pf_700_700      | -6.6395316      | Down       | 9.398292        | Up         | 1.1460778      | Up         |
| Pfa3D7;chr14;PF14_0382;Pf_4491_4491    | -3.2469501      | Down       | 2.824223        | Up         | -1.3129134     | Down       |
| Pfa3D7;pfa1_chr1;PFA0650w;Pf_2330_2330 | 7.6314654       | Up         | -3.4156435      | Down       | 2.0293245      | Up         |
| Pfa3D7;pfa1_chr1;PFA0650w;Pf_2390_2390 | 8.440719        | Up         | -3.449857       | Down       | 2.2353845      | Up         |
| Pfa3D7;pfa1_chr1;PFA0655w;Pf_2441_2441 | 9.328502        | Up         | -2.7795923      | Down       | 2.7345047      | Up         |
| Pfa3D7;chr13;PF13_0074;Pf_5250_5250    | 8.288827        | Up         | -5.0894294      | Down       | 1.4350828      | Up         |
| Pfa3D7;chr13;PF13_0074;Pf_5210_5210    | 8.097024        | Up         | -4.6506543      | Down       | 1.600625       | Up         |
| Pfa3D7;pfa1_chr4;PFD0105c;Pf_2277_2277 | 4.8951197       | Up         | -1.4443665      | Down       | 3.2285001      | Up         |
| Pfa3D7;pfa1_chr4;PFD0105c;Pf_2229_2229 | 4.84807         | Up         | -1.42452        | Down       | 3.2451706      | Up         |
| Pfa3D7;pfa1_chr4;PFD1160w;Pf_7039_7039 | 4.538997        | Up         | -1.8926142      | Down       | 2.0873902      | Up         |
| Pfa3D7;chr8;MAL8P1.1;Pf_2858_2858      | -3.302323       | Down       | 2.9246824       | Up         | 1.0298592      | Up         |
| Pfa3D7;chr12;PFL0505c;Pf_818_818       | -2.296601       | Down       | 1.8088738       | Up         | -1.1626688     | Down       |
| Pfa3D7;pfa1_chr9;PFI0790w;Pf_313_313   | 2.0268188       | Up         | -1.6220852      | Down       | 1.2142407      | Up         |
| Pfa3D7;chr14;PF14_0545;Pf_239_239      | -1.6479403      | Down       | 2.885146        | Up         | 1.8290467      | Up         |
| Pfa3D7;chr7;MAL7P1.88;Pf_1253_1253     | -2.051615       | Down       | 1.741798        | Up         | -1.1794411     | Down       |
| Pfa3D7;chr12;PFL2465c;Pf_497_497       | 1.430005        | Up         | -2.1623647      | Down       | -1.46863       | Down       |
| Pfa3D7;chr12;PFL0430w;Pf_98_98         | -2.9127965      | Down       | 2.6594305       | Up         | -1.0690103     | Down       |
| Pfa3D7;pfa1_chr9;PFI0970c;Pf_3178_3178 | 2.4203947       | Up         | -1.8291525      | Down       | 1.2492129      | Up         |
| Pfa3D7;chr10;PF10_0075;Pf_4593_4593    | -4.1857924      | Down       | 2.5058014       | Up         | -1.8437892     | Down       |
| Pfa3D7;chr11;PF11_0091;Pf_5337_5337    | -6.390821       | Down       | 1.3982557       | Up         | -4.118069      | Down       |
| Pfa3D7;chr13;PF13_0097;Pf_7815_7815    | -6.1187477      | Down       | 2.3074286       | Up         | -2.4615989     | Down       |
| Pfa3D7;chr7;PF07_0126;Pf_3888_3888     | 2.4891737       | Up         | -1.6497486      | Down       | 1.5475844      | Up         |
| Pfa3D7;chr7;PF07_0126;Pf_3828_3828     | 2.5682476       | Up         | -1.6337366      | Down       | 1.5950463      | Up         |
| Pfa3D7;chr6;PFF0200c;Pf_5517_5517      | 2.0787826       | Up         | -2.057131       | Down       | 1.1238402      | Up         |
| Pfa3D7;pfa1_chr4;PFD0360w;Pf_812_812   | 2.2028182       | Up         | -1.6958923      | Down       | 1.135398       | Up         |
| Pfa3D7;pfa1_chr5;PFE0305w;Pf_907_907   | 2.2212696       | Up         | -1.7620292      | Down       | 1.2029546      | Up         |
| Pfa3D7;pfa1_chr5;PFE0305w;Pf_767_767   | 2.3168187       | Up         | -1.6759226      | Down       | 1.2735348      | Up         |
| Pfa3D7;pfa1_chr5;PFE0870w;Pf_3279_3279 | -2.014028       | Down       | 1.8341657       | Up         | -1.1605897     | Down       |
| Pfa3D7;pfa1_chr5;PFE0870w;Pf_3237_3237 | -2.0155933      | Down       | 1.8384188       | Up         | -1.1492131     | Down       |
| Pfa3D7;chr14;PF14_0344;Pf_2735_2735    | -1.0661632      | Down       | -1.8550837      | Down       | -2.0118642     | Down       |
| Pfa3D7;pfa1_chr9;PFI0720w;Pf_1461_1461 | 2.2250104       | Up         | -2.3410146      | Down       | -1.0197326     | Down       |
| Pfa3D7;pfa1_chr5;PFE1185w;Pf_1856_1856 | 2.506407        | Up         | -2.5901299      | Down       | -1.0578626     | Down       |
| Pfa3D7;pfa1_chr9;PFI0720w;Pf_1421_1421 | 2.1049178       | Up         | -2.1466305      | Down       | 1.0079434      | Up         |
| Pfa3D7;chr11;PF11_0310;Pf_1769_1769    | -2.4167647      | Down       | 1.4543699       | Up         | -1.6089525     | Down       |
| Pfa3D7;pfa1_chr5;PFE1185w;Pf_1761_1761 | 2.4876542       | Up         | -2.5239413      | Down       | -1.02886       | Down       |
| Pfa3D7;chr11;PF11_0310;Pf_1621_1621    | -2.4427683      | Down       | 1.5126209       | Up         | -1.5249596     | Down       |
| Pfa3D7;pfa1_chr5;PFE0410w;Pf_957_957   | -1.8750066      | Down       | 2.0817013       | Up         | 1.1229632      | Up         |
| Pfa3D7;pfa1_chr5;PFE0410w;Pf_369_369   | -2.0195162      | Down       | 2.2057207       | Up         | 1.1203772      | Up         |
| Pfa3D7;pfa1_chr3;PFC0831w;Pf_954_954   | 1.1176881       | Up         | -2.8084404      | Down       | -2.4474845     | Down       |
| Pfa3D7;chr14;PF14_0378;Pf_511_511      | -1.0609324      | Down       | 2.0168357       | Up         | 1.7708415      | Up         |
| Pfa3D7;chr14;PF14_0378;Pf_168_168      | -1.0199747      | Down       | 2.068132        | Up         | 1.864608       | Up         |
| Pfa3D7;chr11;PF11_0198;Pf_667_667      | -2.1541302      | Down       | 1.8692267       | Up         | -1.1221886     | Down       |
| Pfa3D7;chr8;PF08_0003;Pf_1957_1957     | 5.7390428       | Up         | -2.185284       | Down       | 2.5527236      | Up         |
| Pfa3D7;chr8;PF08_0003;Pf_1855_1855     | 5.9343395       | Up         | -2.8531604      | Down       | 2.021776       | Up         |
| Pfa3D7;chr14;PF14_0725;Pf_1427_1427    | 1.008558        | Up         | -2.6063986      | Down       | -2.7903197     | Down       |
| Pfa3D7;chr14;PF14_0502;Pf_944_944      | -1.7159652      | Down       | 2.08643         | Up         | 1.1747334      | Up         |
| Pfa3D7;chr14;PF14_0502;Pf_484_484      | -1.9494838      | Down       | 2.3418922       | Up         | 1.1928395      | Up         |
| Pfa3D7;chr8;MAL8P1.9;Pf_161_161        | -1.679611       | Down       | 2.256581        | Up         | 1.3080281      | Up         |

| Accession number                       | [UT8] vs [UT16] |            | [UT16] vs [T16] |            | [UT8] vs [T16] |            |
|----------------------------------------|-----------------|------------|-----------------|------------|----------------|------------|
|                                        | Fold-change     | Regulation | Fold-change     | Regulation | Fold-change    | Regulation |
| Pfa3D7;chr13;MAL13P1.227;Pf_613_613    | -2.1839547      | Down       | 1.7787642       | Up         | -1.2406946     | Down       |
| Pfa3D7;chr12;PFL2175w;Pf_336_336       | -1.3941178      | Down       | 2.6209989       | Up         | 1.8797537      | Up         |
| Pfa3D7;pfal_chr9;PFI1030c;Pf_376_376   | -1.8156888      | Down       | 2.1615694       | Up         | 1.2325306      | Up         |
| Pfa3D7;chr11;PF11_0393;Pf_182_182      | 2.793835        | Up         | -2.0582697      | Down       | 1.3692751      | Up         |
| Pfa3D7;pfal_chr4;PFD0165w;Pf_1139_1139 | -2.0140738      | Down       | 1.9852178       | Up         | -1.0963767     | Down       |
| Pfa3D7;chr13;MAL13P1.64;Pf_135_135     | -2.032307       | Down       | 1.87068         | Up         | -1.0287813     | Down       |
| Pfa3D7;chr13;PF13_0084;Pf_474_474      | 2.526586        | Up         | -3.6455228      | Down       | -1.6630652     | Down       |
| Pfa3D7;chr13;PF13_0084;Pf_434_434      | 2.423914        | Up         | -4.25215        | Down       | -2.0973957     | Down       |
| Pfa3D7;pfal_chr3;PFC0550w;Pf_1759_1759 | -3.2798235      | Down       | 2.0874512       | Up         | -1.4255887     | Down       |
| Pfa3D7;pfal_chr3;PFC0550w;Pf_1799_1799 | -3.2252707      | Down       | 2.17476         | Up         | -1.5068218     | Down       |
| Pfa3D7;chr14;PF14_0462;Pf_2336_2336    | -1.9267459      | Down       | 2.3693743       | Up         | 1.2015934      | Up         |
| Pfa3D7;chr14;PF14_0462;Pf_2416_2416    | -1.8328427      | Down       | 2.4044762       | Up         | 1.3254657      | Up         |
| Pfa3D7;chr11;PF11_0385;Pf_1208_1208    | -2.5362995      | Down       | 1.8896244       | Up         | -1.3112448     | Down       |
| Pfa3D7;chr11;PF11_0385;Pf_1087_1087    | -2.42557        | Down       | 2.0008216       | Up         | -1.1969957     | Down       |
| Pfa3D7;chr10;PF10_0261;Pf_1715_1715    | 1.0706543       | Up         | -2.0583813      | Down       | -1.7709906     | Down       |
| Pfa3D7;chr14;PF14_0608;Pf_1991_1991    | 2.7068746       | Up         | -1.936532       | Down       | 1.333354       | Up         |
| Pfa3D7;chr14;PF14_0608;Pf_1891_1891    | 2.3995376       | Up         | -2.0638735      | Down       | 1.1267214      | Up         |
| Pfa3D7;chr12;PFL0440c;Pf_3427_3427     | 1.5850893       | Up         | -2.0238695      | Down       | -1.2931726     | Down       |
| Pfa3D7;chr6;PFF0485c;Pf_712_712        | 2.0349562       | Up         | -2.1232812      | Down       | 1.0669193      | Up         |
| Pfa3D7;chr14;PF14_0610;Pf_951_951      | 2.3622766       | Up         | -1.9660877      | Down       | 1.125255       | Up         |
| Pfa3D7;chr6;PFF0485c;Pf_752_752        | 2.0604258       | Up         | -2.0535142      | Down       | 1.0935987      | Up         |
| Pfa3D7;chr12;PFL0465c;Pf_4313_4313     | -2.0562124      | Down       | 1.5615336       | Up         | -1.3967856     | Down       |
| Pfa3D7;chr10;PF10_0216;Pf_615_615      | 1.0352788       | Up         | -2.0014305      | Down       | -1.9074595     | Down       |
| Pfa3D7;pfal_chr1;PFA0170c;Pf_4661_4661 | -2.2696257      | Down       | 1.7648969       | Up         | -1.2113625     | Down       |
| Pfa3D7;pfal_chr4;PFD0015c;Pf_801_801   | -2.6595805      | Down       | 3.0704975       | Up         | 1.1559079      | Up         |
| Pfa3D7;pfal_chr4;PFD0015c;Pf_721_721   | -2.8016038      | Down       | 3.2891905       | Up         | 1.2740954      | Up         |
